# Supplementary material for: Resin-immobilized pyrrolidine-based chiral organocatalysts for asymmetric Michael additions of ketones and aldehydes to nitroolefins
Source: Royal Society of Chemistry journal article supplement (doi:10.1039/c4ra10684a), 2014-12-05

**Supporting Information for:**  
**Resin-Immobilized Pyrrolidine-Based Chiral Organocatalysts for**  
**Asymmetric Michael Additions of Ketones and Aldehydes to**  
**Nitroolefins**

Richeng Zhang, Guohui Yin, Yang Li, Xilong Yan, and Ligong Chen\*

*School of Chemical Engineering and Technology, Tianjin University, Tianjin, China.*

*Collaborative Innovation Center of Chemical Science and Engineering (Tianjin), Tianjin  
300072, China*

*E-mail: lgchen@tju.edu.cn*

**General Methods:**  $^1\text{H}$  and  $^{13}\text{C}$  NMR were recorded on Varian-500 or Avance III 600 instruments. Chemical shifts were reported in ppm down field from internal Me<sub>4</sub>Si. Mass spectra were recorded using electrospray ionization (ESI) on LCQ Advanted MAX Mass instruments. HPLC analysis was measured using ChiralPak AS-H column.

**Materials:** Commercial reagents were used without purification except for otherwise explanation. Analytical thin layer chromatography was performed on 0.20 mm silica gel plates and silica gel (200-300 mesh) was used for flash chromatography both purchased from Qingdao Haiyang Chem. Company, Ltd..

**Preparation of catalysts:**

**1. Preparation of catalyst 1:**

To a stirred solution of L-proline (10 g, 0.1 mol) in dioxane (200 ml) were added K<sub>2</sub>CO<sub>3</sub> (16.4 g, 0.12 mol) and benzyl chloride (15 g, 0.12 mol). The mixture was refluxed for 3 hours, then concentrated in vacuo. The residue was dissolved in 200 ml 2 M sodium hydroxide aqueous solution. Then it was extracted by CH<sub>2</sub>Cl<sub>2</sub> (200 ml\*2). The organic phase was dried by MgSO<sub>4</sub> then purified by column chromatography (CH<sub>3</sub>OH:EA=1:10) to afford product **4** (18.1 g, 97.3%),  $^1\text{H}$  NMR (600 MHz, CDCl<sub>3</sub>)  $\delta$ : 1.67-1.72 (2H, m), 1.80-1.86 (1H, m), 1.90-1.95 (1H, m), 2.27-2.31 (1H, m), 2.71-2.75 (1H, m), 2.96-2.99 (1H, m), 3.35 (1H, d,  $J$ =12.6 Hz), 3.41-3.44 (1H, m), 3.64-3.67 (1H, m), 3.87 (1H, d,  $J$ =13.2 Hz), 7.24-7.33 (5H, m).

To a stirred solution of **4** (11.64 g, 0.06 mol) in CH<sub>2</sub>Cl<sub>2</sub> (150 ml) was added triethylamine (8.62 g, 0.085 mol), then the methylsulfonyl chloride (9.73 g, 0.085 mol) was added dropwise under ice-bath cooling. The reaction mixture was stirred at room temperature for 2 hours and washed by 100 ml 2 M sodium hydroxide aqueous solution. The organic phase was dried by MgSO<sub>4</sub>, filtered, and evaporated to dryness

to afford product **5** (16.2 g, 98.8%).

To a stirred solution of **5** (7.0 g, 0.026 mol) in CH<sub>3</sub>OH (100 ml) was added piperidine (11.0 g, 0.13 mol). The reaction mixture was refluxed for 12 hours, then concentrated in vacuo to remove CH<sub>3</sub>OH and remainder piperidine. The residue was dissolved in 200 ml 2 M sodium hydroxide aqueous solution. Then it was extracted by CH<sub>2</sub>Cl<sub>2</sub> (200 ml). The organic phase was dried by MgSO<sub>4</sub> then purified by column chromatography (CH<sub>3</sub>OH:EA=1:10) to afford product **6** (4.73 g, 70.6%). <sup>1</sup>H NMR (600 MHz, CDCl<sub>3</sub>) δ: 1.22-1.26 (2H, m), 1.41 (2H, m), 1.51-1.74 (8H, m), 1.94-2.00 (1H, m), 2.11-2.15 (1H, m), 2.27-2.31 (1H, m), 2.52-2.55 (1H, m), 2.60-2.65 (1H, m), 2.88-2.92 (1H, m), 3.24 (1H, d, *J*=12.6 Hz), 3.69-3.73 (1H, q, *J*=7.2 Hz), 4.22 (1H, d, *J*=12.6 Hz), 7.21-7.23 (1H, m), 7.28-7.33 (4H, m).

To a solution of **6** (4.73 g, 0.018 mol) in CH<sub>3</sub>OH (50 ml) was added Pd/C (10%, 2.5 g). The reaction mixture was stirred at 80 °C, 1.0 MPa H<sub>2</sub> atmosphere for 10 hours. Then the mixture was filtered to remove Pd/C, and purified by column chromatography (ammonia water: CH<sub>3</sub>OH=1:30) to afford product **7** (2.26 g, 73.4%). <sup>1</sup>H NMR (600 MHz, CDCl<sub>3</sub>) δ: 1.32-1.42 (3H, m), 1.50-1.64 (4H, m), 1.73-1.77 (2H, m), 1.87-1.90 (1H, m), 2.27-2.33 (4H, m), 2.42-2.58 (2H, m), 2.87-3.02 (2H, m), 3.31-3.33 (1H, m).

To a solution of **7** (1.0 g, 5.95 mmol) in CH<sub>2</sub>Cl<sub>2</sub> (20 ml) was added activated resin (2.58 g, contain sulfonic acid group 4.96 mmol). The reaction mixture was stirred for 24 hours at room temperature and then filtered. The insoluble substance was washed by CH<sub>2</sub>Cl<sub>2</sub> (10 ml\*2) and dried at 40 °C for 2 hours to afford catalyst **1**. Elemental analysis: C: 53.92%, H: 6.93%, N: 5.21%, S: 9.71%, organic catalyst loading: 1.861 mmol/g.

## 2. Preparation of catalyst 2:

The product **8** was synthesized from **5** utilizing the similar procedure of synthesizing **6**. The product **8** <sup>1</sup>H NMR (600 MHz, CDCl<sub>3</sub>) δ: 1.51-1.73 (2H, m), 1.82-1.99 (2H, m), 2.27 (3H, s), 2.32-2.66 (11H, m), 2.78-2.79 (0.5H, m), 2.89-2.93 (0.5H, m), 3.03-3.05 (0.5H, m), 3.26 (0.5H, d, *J*=13.2 Hz), 3.48-3.54 (1H, m), 3.67-3.71 (1H, m), 7.21-7.33 (5H, m).

The product **9** was synthesized from **8** utilizing the similar procedure of synthesizing **7**. The product **9** <sup>1</sup>H NMR (600 MHz, CDCl<sub>3</sub>) δ: 1.29-1.46 (2H, m), 1.69-1.76 (2H, m), 2.26 (3H, s), 2.29-2.60 (10H, m), 2.81-2.86 (1H, m), 2.93-3.00 (1H, m), 3.19-3.27 (1H, m).

To a solution of **9** (1.0 g, 5.46 mmol) in CH<sub>2</sub>Cl<sub>2</sub> (20 ml) was added activated resin (4.74 g, contain sulfonic acid group 9.11 mmol). The reaction mixture was stirred for 24 hours at room temperature and then filtered. The insoluble substance was washed by CH<sub>2</sub>Cl<sub>2</sub> (10 ml\*2) and dried at 40 °C for 2 hours to afford catalyst **2**. Elemental analysis: C: 52.81%, H: 7.22%, N: 4.74%, S: 10.61%, organic catalyst loading: 1.129 mmol/g.

### **3. Preparation of catalyst 3:**

The product **10** was synthesized from **5** utilizing the similar procedure of synthesizing **6**. The product **10** <sup>1</sup>H NMR (600 MHz, CDCl<sub>3</sub>) δ: 1.56-1.71 (3H, m), 1.85-1.98 (2H, m), 2.12-2.19 (1H, m), 2.31-2.36 (1H, m), 2.51-2.65 (12H, m), 2.89-2.93 (1H, m), 3.25-3.28 (1H, m), 3.59-3.61 (2H, m), 7.23-7.33 (5H, m).

The product **11** was synthesized from **10** utilizing the similar procedure of synthesizing **5**.

The product **12** was synthesized from **11** utilizing the similar procedure of synthesizing **6**. The product **12** <sup>1</sup>H NMR (600 MHz, CDCl<sub>3</sub>) δ: 1.29 (6H, t, *J*=10.8 Hz), 1.73-2.07 (4H, m), 2.41-2.46 (2H, m), 2.49-2.68 (8H, m), 2.78-2.91 (2H, m), 2.93-3.14 (8H, m), 3.47-3.69 (1H, m), 4.26-4.43 (2H, m), 7.27-7.43 (5H, m).

The product **13** was synthesized from **12** utilizing the similar procedure of synthesizing **7**. The product **13** <sup>1</sup>H NMR (600 MHz, CDCl<sub>3</sub>) δ: 0.76 (6H, t, *J*=10.8 Hz), 1.06-1.21 (2H, m), 1.47-1.73 (2H, m), 2.02-2.11 (2H, m), 2.21-2.33 (16H, m), 2.56-2.74 (2H, m), 2.93-3.01 (1H, m). <sup>13</sup>C NMR (150 MHz, CDCl<sub>3</sub>) δ: 11.59, 24.75, 29.72, 45.79, 47.24, 49.12, 50.09, 53.54, 55.11, 56.59, 63.76.

To a solution of **13** (1.0 g, 3.73 mmol) in CH<sub>2</sub>Cl<sub>2</sub> (20 ml) was added activated resin (4.86 g, contain sulfonic acid group 9.33 mmol). The reaction mixture was stirred for 24 hours at room temperature and then filtered. The insoluble substance was washed by CH<sub>2</sub>Cl<sub>2</sub> (10 ml\*2) and dried at 40 °C for 2 hours to afford catalyst **3**. Elemental analysis: C: 52.27%, H: 6.95%, N: 4.95%, S: 12.08%, organic catalyst loading: 0.084 mmol/g.

### **General experimental procedure for the Michael addition of cyclohexanone to nitroalkene by catalyst 1, 2 and 3.**

To a solution of cyclohexanone (10 mmol) and nitroalkene (1 mmol) was added resin-immobilized catalyst (contain 0.1 mmol organic catalyst). The mixture was stirred at room temperature for 48 hours. Then the mixture was filtered and washed by CH<sub>2</sub>Cl<sub>2</sub> (10 ml\*2), and the product was purified by flash chromatography on silica gel.

Other asymmetric Michael additions of ketones and aldehydes to nitroolefins utilized the similar procedure.

**NMR data and HPLC data for Michael addition products of Table 4.**

**The product of entry 1:**

$^1\text{H}$  NMR (500 MHz,  $\text{CDCl}_3$ )  $\delta$ : 1.10-1.22 (1H, m), 1.43-1.74 (4H, m), 1.96-2.04 (1H, m), 2.27-2.45 (2H, m), 2.57-2.66 (1H, m), 3.67-3.74 (1H, m), 4.58 (1H, dd,  $J=12.5$  Hz, 10.0 Hz), 4.89 (1H, dd,  $J=12.5$  Hz, 4.5 Hz), 7.10-7.28 (5H, m);

$^{13}\text{C}$  NMR (125 MHz,  $\text{CDCl}_3$ )  $\delta$ : 25.2, 28.6, 33.3, 42.7, 44.2, 52.4, 79.0, 127.8, 128.3, 129.0, 137.7, 211.1

MS (ESI,  $m/z$ ): 248.1 ( $\text{M}+\text{H}^+$ )

The enantiomeric excess was determined by chiral HPLC with a Chiralpack AS-H column at 254 nm (hexane:2-propanol=9:1), 1.0 ml/min;  $t_r$ =15.4 min (minor), 23.8 min (major).

**The product of entry 2:**

$^1\text{H}$  NMR (500 MHz,  $\text{CDCl}_3$ )  $\delta$ : 1.21-1.29 (1H, m), 1.58-1.83 (4H, m), 2.04-2.11 (1H, m), 2.33 (3H, s), 2.36-2.43 (1H, m), 2.47-2.50 (1H, m), 2.66-2.70 (1H, m), 3.70-3.75 (1H, m), 4.60-4.63 (1H, m), 4.91-4.94 (1H, m), 7.05 (2H, d,  $J=8.0$  Hz), 7.13 (2H, d,  $J=8.0$  Hz).

$^{13}\text{C}$  NMR (125 MHz,  $\text{CDCl}_3$ )  $\delta$ : 21.0, 24.8, 28.5, 33.2, 42.6, 43.5, 52.5, 79.1, 127.9, 129.5, 134.5, 137.3, 211.8

MS (ESI,  $m/z$ ): 266.3 ( $\text{M}+\text{H}^+$ )

The enantiomeric excess was determined by chiral HPLC with a Chiralpack AS-H column at 254 nm (hexane:2-propanol=9:1), 1.0 ml/min;  $t_r$ =10.8 min (minor), 19.8 min (major).

**The product of entry 3:**

$^1\text{H}$  NMR (500 MHz,  $\text{CDCl}_3$ )  $\delta$ : 1.18-1.28 (1H, m), 1.56-1.82 (4H, m), 2.05-2.12 (1H, m), 2.34-2.42 (1H, m), 2.46-2.51 (1H, m), 2.61-2.68 (1H, m), 3.68-3.74 (1H, m), 3.79 (3H, s), 4.58-4.61 (1H, m), 4.90-4.93 (1H, m), 6.85 (2H, d,  $J=8.5$  Hz), 7.05 (2H, d,  $J=8.5$  Hz).

$^{13}\text{C}$  NMR (125 MHz,  $\text{CDCl}_3$ )  $\delta$ : 24.8, 28.5, 33.1, 42.5, 43.1, 52.4, 55.1, 78.9, 114.1, 129.1, 129.6, 158.8, 211.8.

MS (ESI,  $m/z$ ): 278.1 ( $\text{M}+\text{H}^+$ )

The enantiomeric excess was determined by chiral HPLC with a Chiralpack AS-H column at 254 nm (hexane:2-propanol=9:1), 1.0 ml/min;  $t_r$ =33.0 min (minor), 47.8

min (major).

**The product of entry 4:**

$^1\text{H}$  NMR (500 MHz,  $\text{CDCl}_3$ )  $\delta$  : 1.19-1.28 (1H, m), 1.56-1.83 (4H, m), 2.06-2.13 (1H, m), 2.34-2.42 (1H, m), 2.46-2.52 (1H, m), 2.63-2.67 (1H, m), 3.74-3.78 (1H, m), 4.59-4.63 (1H, m), 4.92-4.96 (1H, m) , 7.12-7.14 (2H, m) , 7.29-7.33 (2H, m).

$^{13}\text{C}$  NMR (125 MHz,  $\text{CDCl}_3$ )  $\delta$ : 25.1, 28.4, 33.3, 42.6, 43.5, 52.3, 78.4, 129.1, 129.5, 133.5, 136.2, 211.7.

MS (ESI,  $m/z$ ): 282.0 ( $\text{M}+\text{H}^+$ )

The enantiomeric excess was determined by chiral HPLC with a Chiralpack AS-H column at 254 nm (hexane:2-propanol=9:1), 1.0 ml/min;  $t_r$ =16.3 min (minor), 29.0 min (major).

**The product of entry 5:**

$^1\text{H}$  NMR (500 MHz,  $\text{CDCl}_3$ )  $\delta$  : 1.24-1.33 (1H, m), 1.57-1.84 (4H, m), 2.07-2.14 (1H, m), 2.35-2.44 (1H, m), 2.46-2.51 (1H, m), 2.77-2.82 (1H, m), 3.89-3.93 (1H, m), 4.85-4.96 (2H, m) , 7.15-7.37 (4H, m).

$^{13}\text{C}$  NMR (125 MHz,  $\text{CDCl}_3$ )  $\delta$ : 25.1, 28.5, 33.2, 41.8, 43.3, 51.8, 77.9, 129.0, 129.8, 134.1, 136.1, 211.7.

MS (ESI,  $m/z$ ): 282.0 ( $\text{M}+\text{H}^+$ )

The enantiomeric excess was determined by chiral HPLC with a Chiralpack AS-H column at 254 nm (hexane:2-propanol=9:1), 1.0 ml/min;  $t_r$ =16.3 min (minor), 31.0 min (major).

**The product of entry 6:**

$^1\text{H}$  NMR (500 MHz,  $\text{CDCl}_3$ )  $\delta$  : 1.31-1.38 (1H, m), 1.59-1.83 (4H, m), 2.09-2.15 (1H, m), 2.37-2.45 (1H, m), 2.47-2.51 (1H, m), 2.90-2.96 (1H, m), 4.27-4.33 (1H, m), 4.87-4.94 (2H, m), 7.20-7.25 (3H, m) , 7.36-7.39 (1H, m).

$^{13}\text{C}$  NMR (125 MHz,  $\text{CDCl}_3$ )  $\delta$ : 25.2, 28.5, 33.1, 41.1, 42.8, 51.5, 77.3, 128.8, 130.4, 134.7, 135.5, 211.8,

MS (ESI,  $m/z$ ): 282.1 ( $\text{M}+\text{H}^+$ )

The enantiomeric excess was determined by chiral HPLC with a Chiralpack AS-H column at 254 nm (hexane:2-propanol=9:1), 1.0 ml/min;  $t_r$ =14.0 min (minor), 20.9 min (major).

**The product of entry 7:**

$^1\text{H}$  NMR (500 MHz,  $\text{CDCl}_3$ )  $\delta$  : 1.31-1.38 (1H, m), 1.60-1.85 (4H, m), 2.11-2.15 (1H, m), 2.35-2.42 (1H, m), 2.46-2.52 (1H, m), 2.84-2.94 (1H, m), 4.11-4.24 (1H, m),

4.86-4.92 (2H, m) , 7.16 (1H, d,  $J=8.5$  Hz) , 7.24 (1H, dd,  $J_1=8.5$  Hz,  $J_2=2.0$  Hz), 7.43 (1H, d,  $J=2.0$  Hz).

$^{13}\text{C}$  NMR (125 MHz,  $\text{CDCl}_3$ )  $\delta$ : 25.1, 27.0, 28.3, 32.9, 40.4, 42.7, 51.5, 77.4, 127.8, 130.0, 133.9, 134.4, 135.2, 211.5.

MS (ESI,  $m/z$ ): 316.2 ( $\text{M}+\text{H}^+$ )

The enantiomeric excess was determined by chiral HPLC with a Chiralpack AS-H column at 254 nm (hexane:2-propanol=9:1), 1.0 ml/min;  $t_r=11.1$  min (minor), 20.1 min (major).

**The product of entry 8:**

$^1\text{H}$  NMR (500 MHz,  $\text{CDCl}_3$ )  $\delta$  : 1.23-1.31 (1H, m), 1.55-1.84 (4H, m), 2.07-2.14 (1H, m), 2.35-2.44 (1H, m), 2.48-2.54 (1H, m), 2.65-2.69 (1H, m), 3.75-3.81 (1H, m), 4.59-4.63 (1H, m), 4.93-4.96 (1H, m) , 7.16-7.21 (2H, m) , 7.32-7.38 (2H, m).

$^{13}\text{C}$  NMR (125 MHz,  $\text{CDCl}_3$ )  $\delta$ : 25.0, 28.3, 33.4, 42.5, 43.6, 52.2, 78.5, 129.2, 129.6, 133.4, 140.2, 211.7.

MS (ESI,  $m/z$ ): 326.0 ( $\text{M}+\text{H}^+$ ), 328.0 ( $\text{M}+\text{H}^+$ )

The enantiomeric excess was determined by chiral HPLC with a Chiralpack AS-H column at 254 nm (hexane:2-propanol=9:1), 1.0 ml/min;  $t_r=16.9$  min (minor), 30.3 min (major).

**The product of entry 9:**

$^1\text{H}$  NMR (500 MHz,  $\text{CDCl}_3$ )  $\delta$ : 1.22-1.32 (1H, m), 1.56-1.77 (3H, m), 1.78-1.85 (1H, m), 2.08-2.16 (1H, m), 2.44-2.35 (1H, m), 2.52-2.45 (1H, m), 2.78-2.69 (1H, m), 3.91-4.01 (1H, m), 4.66-4.73 (1H, m), 4.97-5.05 (1H, m), 7.41 (2H, d,  $J=8.5$  Hz), 8.15 (2H, d,  $J=8.5$  Hz).

$^{13}\text{C}$  NMR (125MHz,  $\text{CDCl}_3$ )  $\delta$ : 24.9, 28.2, 33.0, 42.4, 43.6, 52.1, 77.9, 123.8, 129.2, 145.5, 147.3, 210.9.

MS (ESI,  $m/z$ ): 315.1 ( $\text{M}+\text{Na}^+$ )

The enantiomeric excess was determined by chiral HPLC with a Chiralpack AS-H column at 254 nm (hexane:2-propanol=7:3), 1.0 ml/min;  $t_r=30.0$  min (major).

**The product of entry 10:**

$^1\text{H}$  NMR (500 MHz,  $\text{CDCl}_3$ )  $\delta$  : 1.19-1.29 (1H, m), 1.57-1.83 (4H, m), 2.05-2.11 (1H, m), 2.36-2.44 (1H, m), 2.46-2.51 (1H, m), 2.62-2.68 (1H, m), 3.69-3.75 (1H, m), 3.79 (3H, s), 4.57-4.61 (1H, m), 4.90-4.94 (1H, m) , 6.85 (2H, d,  $J=8.5$  Hz) , 7.08 (2H, d,  $J=8.5$  Hz).

$^{13}\text{C}$  NMR (125 MHz,  $\text{CDCl}_3$ )  $\delta$ : 25.1, 28.1, 33.0, 41.9, 42.7, 52.1, 77.5, 124.7,

128.4, 129.0, 132.8, 133.0, 150.7, 211.1.

MS (ESI, m/z): 293.2 (M+H<sup>+</sup>)

The enantiomeric excess was determined by chiral HPLC with a Chiralpack AS-H column at 254 nm (hexane:2-propanol=7:3), 1.0 ml/min; t<sub>r</sub>=14.1 min (minor), 18.4 min (major).

**The product of entry 11:**

<sup>1</sup>H NMR (500 MHz, CDCl<sub>3</sub>) δ: 2.52-2.57 (1H, m), 2.60-2.68 (1H, m), 2.85-2.90 (1H, m), 3.26 (1H, dd, J<sub>1</sub>=20.0 Hz, J<sub>2</sub>=8.5 Hz), 3.64-3.86 (3H, m), 4.11-4.18 (1H, m), 4.62-4.68 (1H, m), 4.94 (1H, dd, J<sub>1</sub>=12.5 Hz, J<sub>2</sub>=4.5 Hz), 7.18-7.35 (5H, m).

<sup>13</sup>C NMR (125 MHz, CDCl<sub>3</sub>) δ: 41.3, 42.8, 53.4, 68.8, 71.5, 78.5, 127.7, 128.3, 129.1, 136.3, 208.3.

MS (ESI, m/z): 250.1(M+H<sup>+</sup>)

The enantiomeric excess was determined by chiral HPLC with a Chiralpack AS-H column at 254 nm (hexane:2-propanol=9:1), 1.0 ml/min; t<sub>r</sub>=28.9 min (minor), 38.8 min (major).

**The product of entry 12:**

<sup>1</sup>H NMR (500 MHz, CDCl<sub>3</sub>) δ: 2.14 (3H, s), 2.93 (2H, d, J=5.0 Hz), 3.99-4.04 (1H, m), 4.58-4.63 (1H, m), 4.68-4.73 (1H, m), 7.21-7.55 (5H, m).

<sup>13</sup>C NMR (125 MHz, CDCl<sub>3</sub>) δ: 30.3, 39.0, 46.1, 55.4, 79.4, 127.2, 127.9, 129.1, 138.8, 205.6.

MS (ESI, m/z): 208.0 (M+H<sup>+</sup>)

The enantiomeric excess was determined by chiral HPLC with a Chiralpack AS-H column at 254 nm (hexane:2-propanol=9:1), 1.0 ml/min; t<sub>r</sub>=30.2 min (minor), 37.1 min (major).

**The product of entry 13:**

<sup>1</sup>H NMR (500 MHz, CDCl<sub>3</sub>) δ: 0.98 (3H, d, J=7.5 Hz), 1.08 (3H, t, J=7.5 Hz), 2.34-2.44 (1H, m), 2.55-2.65 (1H, m), 2.93-3.02 (1H, m), 3.67-3.72 (1H, m), 4.58 (1H, dd, J<sub>1</sub>=12.5 Hz, J<sub>2</sub>=4.5 Hz), 4.65 (1H, dd, J<sub>1</sub>=12.5 Hz, J<sub>2</sub>=9.0 Hz), 7.14-7.16 (2H, m), 7.24-7.32 (3H, m).

<sup>13</sup>C NMR (125 MHz, CDCl<sub>3</sub>) δ: 7.1, 14.4, 35.5, 45.9, 49.0, 77.8, 128.8, 138.5, 212.7.

MS (ESI, m/z): 236.2(M+H<sup>+</sup>)

The enantiomeric excess was determined by chiral HPLC with a Chiralpack AS-

H column at 254 nm (hexane:2-propanol=95:5), 1.0 ml/min;  $t_r$ =11.8 min (minor), 16.7 min (major).

**The product of entry 14:**

$^1\text{H}$  NMR (500MHz,  $\text{CDCl}_3$ )  $\delta$ : 1.56-1.78 (2H, m), 1.78-1.97 (2H, m), 2.04-2.54 (3H, m), 3.66–3.73 (1H, m), 5.02 (1H, d,  $J$ =8.5 Hz), 7.15-7.35 (5H, m).

$^{13}\text{C}$  NMR (125 MHz,  $\text{CDCl}_3$ ): 20.1, 28.1, 38.5, 44.0, 50.3, 78.1, 127.7, 127.9, 128.3, 137.3, 218.4.

MS (ESI,  $m/z$ ): 266.1 ( $\text{M}+\text{H}^+$ )

The enantiomeric excess was determined by chiral HPLC with a Chiralpack AS-H column at 254 nm (hexane:2-propanol=9:1), 1.0 ml/min;  $t_r$ =16.5 min (minor), 28.7 min (major).

**The product of entry 15:**

$^1\text{H}$  NMR (500 MHz,  $\text{CDCl}_3$ )  $\delta$ : 1.21-1.31 (1H, m), 1.42-1.83 (6H, m), 1.99-2.07 (1H, m), 2.28-2.47 (2H, m), 2.58-2.69 (1H, m), 3.70-3.77 (1H, m), 4.61-4.64 (1H, m), 4.89-4.93 (1H, m), 7.11-7.29 (5H, m).

$^{13}\text{C}$  NMR (125 MHz,  $\text{CDCl}_3$ )  $\delta$ : 24.9, 26.3, 28.5, 33.5, 43.1, 44.5, 52.7, 79.7, 127.8, 128.5, 129.0, 138.5, 211.5

MS (ESI,  $m/z$ ): 262.1 ( $\text{M}+\text{H}^+$ )

The enantiomeric excess was determined by chiral HPLC with a Chiralpack AS-H column at 254 nm (hexane:2-propanol=95:5), 1.0 ml/min;  $t_r$ =15.6 min (minor), 26.0 min (major).

**The product of entry 16:**

$^1\text{H}$  NMR (500 MHz,  $\text{CDCl}_3$ )  $\delta$ : 0.99 (3H, d,  $J$ =9.0 Hz), 2.71-2.83 (1H, m), 3.75-3.80 (1H, m), 4.61-4.69 (1H, m), 4.72-4.78 (1H, m), 7.16-7.35 (5H, m), 9.72 (1H, d,  $J$ =2.0 Hz).

$^{13}\text{C}$  NMR (125 MHz,  $\text{CDCl}_3$ )  $\delta$ : 12.2, 44.0, 48.5, 78.1, 128.0, 128.1, 129.1, 136.6, 202.1.

MS (ESI,  $m/z$ ): 208.2 ( $\text{M}+\text{H}^+$ )

The enantiomeric excess was determined by chiral HPLC with a Chiralpack AS-H column at 254 nm (hexane:2-propanol=8:2), 1.0 ml/min;  $t_r$ =22.6 min (major), 32.1 min (minor).

**The product of entry 17:**

$^1\text{H}$  NMR (500 MHz,  $\text{CDCl}_3$ )  $\delta$ : 0.81-0.92 (3H, m), 1.48-1.56 (2H, m), 2.66-2.72 (1H, m), 3.77-3.83 (1H, m), 4.61-4.75 (2H, m), 7.18-7.21 (2H, m), 7.29-7.38 (2H, m),

9.72 (1H, d,  $J=2.5$  Hz).

$^{13}\text{C}$  NMR (125 MHz,  $\text{CDCl}_3$ )  $\delta$ : 10.8, 20.5, 42.7, 55.0, 78.4, 128.0, 128.1, 129.1, 136.7, 203.1.

MS (ESI,  $m/z$ ): 222.3 ( $\text{M}+\text{H}^+$ )

The enantiomeric excess was determined by chiral HPLC with a Chiralpack AS-H column at 254 nm (hexane:2-propanol=9:1), 1.0 ml/min;  $t_r$ =12.7 min (major), 26.1 min (minor).

NMR of compound **13**:

<sup>1</sup>H NMR

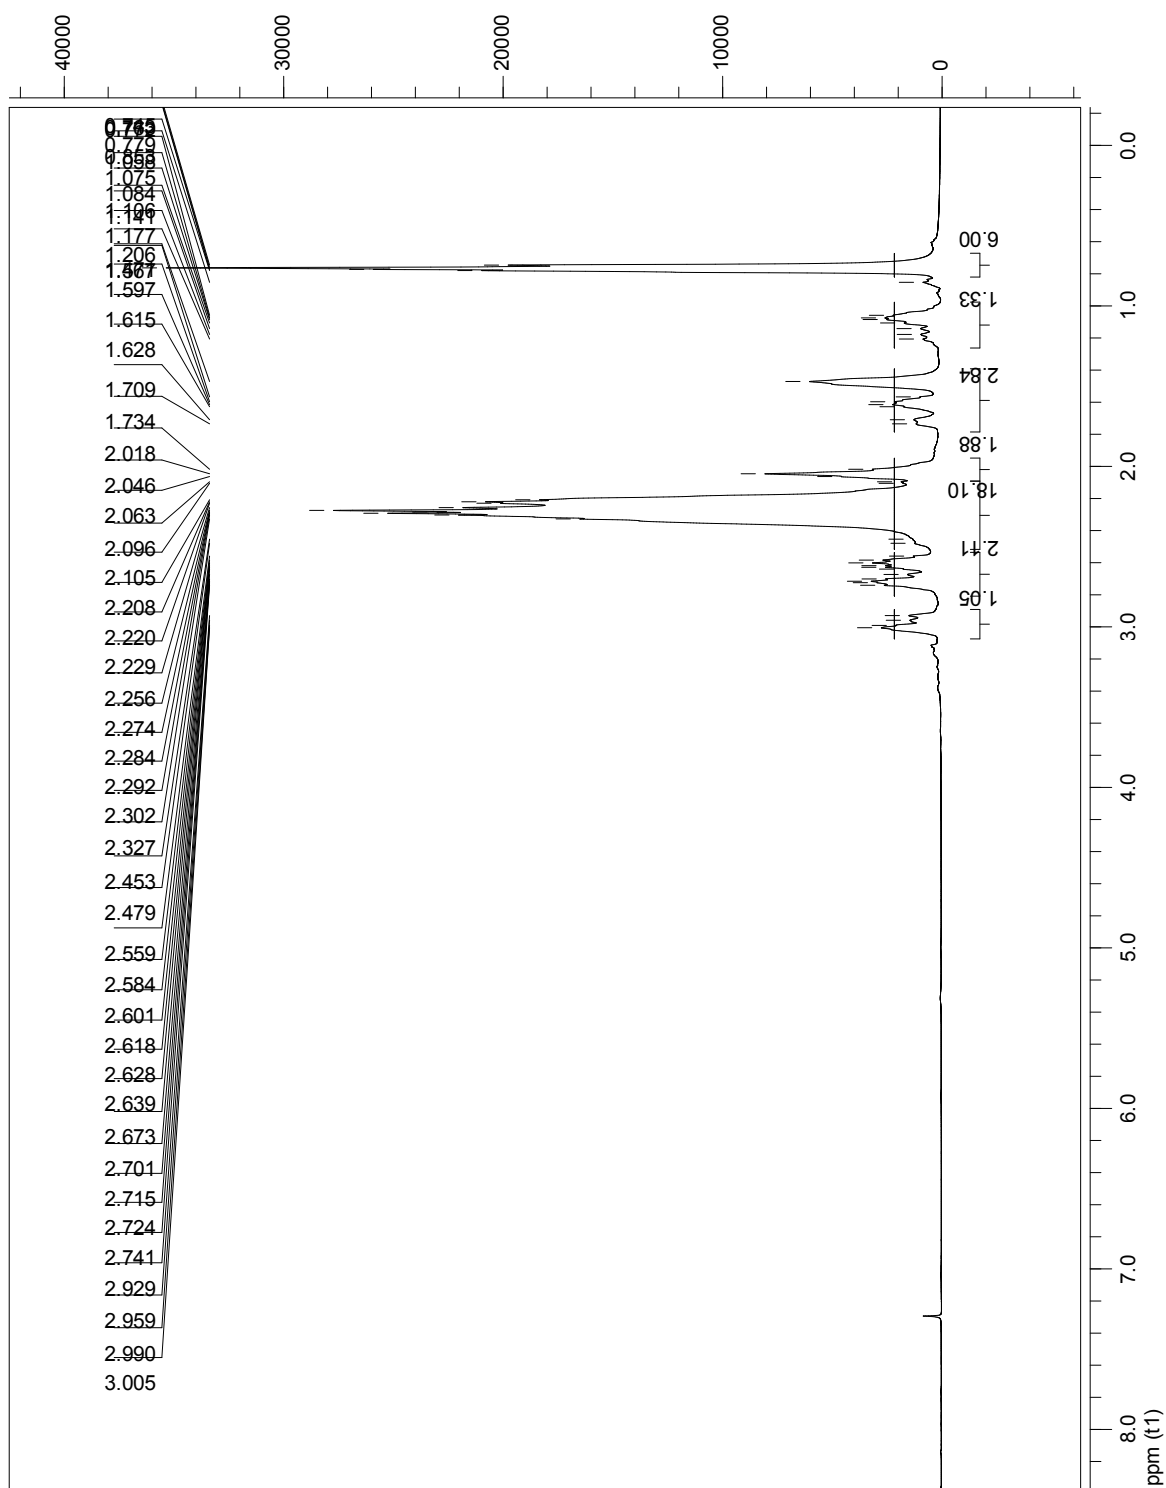

<sup>13</sup>C NMR

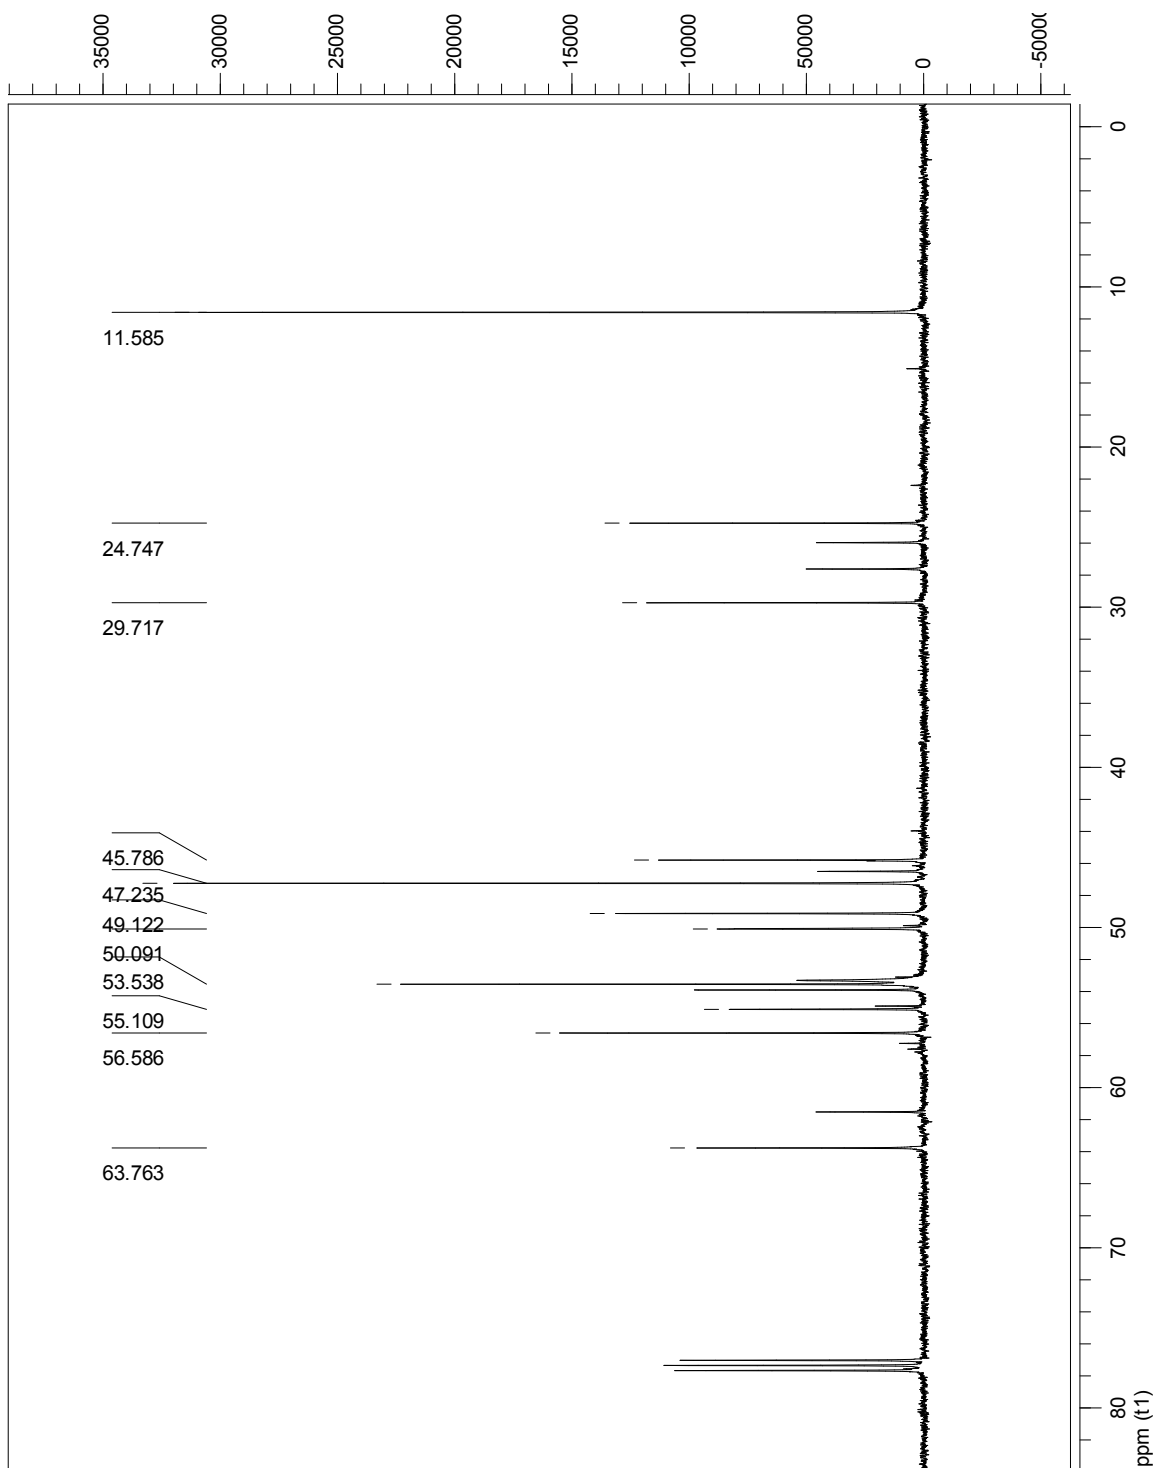

HPLC analysis results:

Table 4 Entry 1

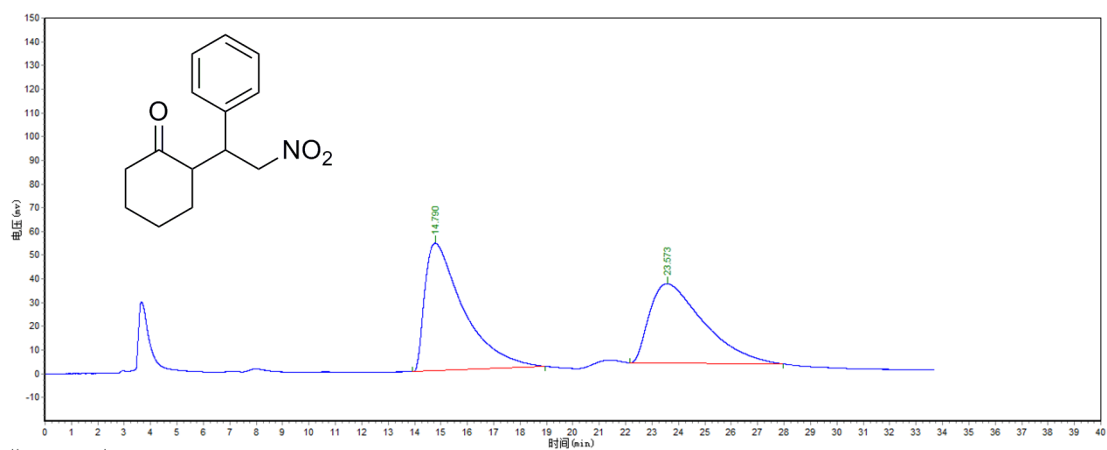

| Analysis Result |         |                   |                           |          |
|-----------------|---------|-------------------|---------------------------|----------|
| Peak#           | RT(min) | Height( $\mu V$ ) | Area( $\mu V \cdot Sec$ ) | Area%    |
| 1               | 14.790  | 53826.652         | 5476112.000               | 53.3610  |
| 2               | 23.573  | 33581.625         | 4786269.500               | 46.6390  |
| Total           |         | 87408.277         | 10262381.500              | 100.0000 |

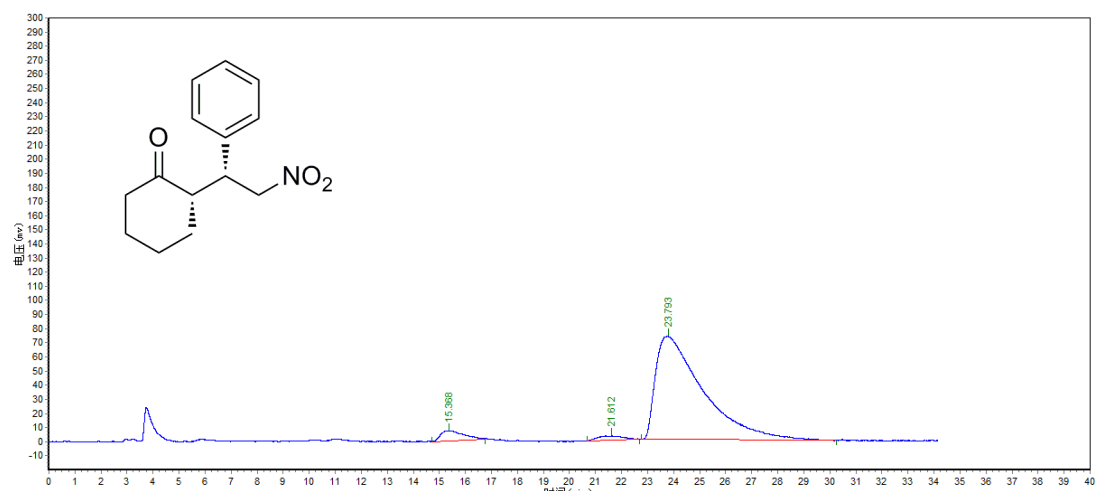

| Analysis Result |         |                   |                           |          |
|-----------------|---------|-------------------|---------------------------|----------|
| Peak#           | RT(min) | Height( $\mu V$ ) | Area( $\mu V \cdot Sec$ ) | Area%    |
| 1               | 15.368  | 7077.769          | 417198.844                | 4.1927   |
| 2               | 21.612  | 3024.380          | 209476.609                | 2.1052   |
| 3               | 23.793  | 73270.852         | 9323860.000               | 93.7021  |
| Total           |         | 83373.000         | 9950535.453               | 100.0000 |

Table 4 Entry 2

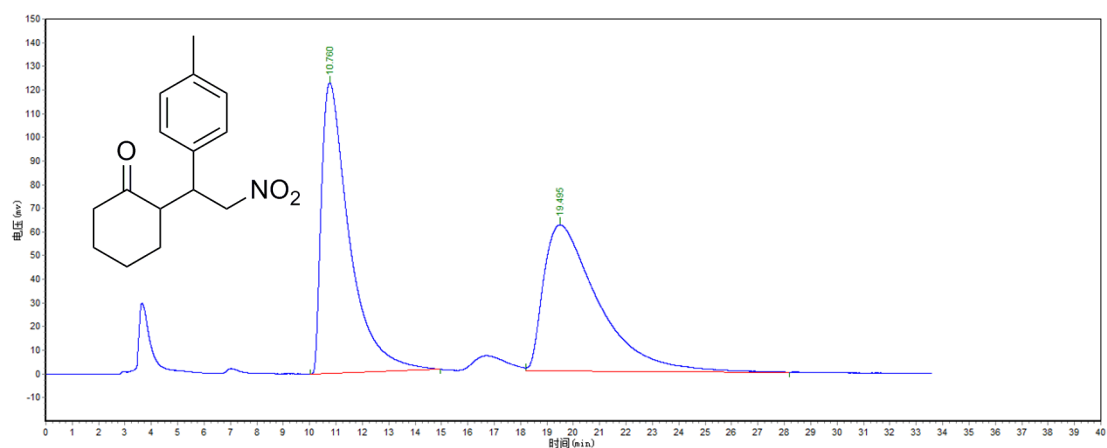

| Analysis Result |         |             |               |          |
|-----------------|---------|-------------|---------------|----------|
| Peak#           | RT(min) | Height (μV) | Area (μV*Sec) | Area%    |
| 1               | 10.760  | 122714.406  | 9017093.000   | 50.3714  |
| 2               | 19.495  | 61737.625   | 8884140.000   | 49.6286  |
| Total           |         | 184452.031  | 17901233.000  | 100.0000 |

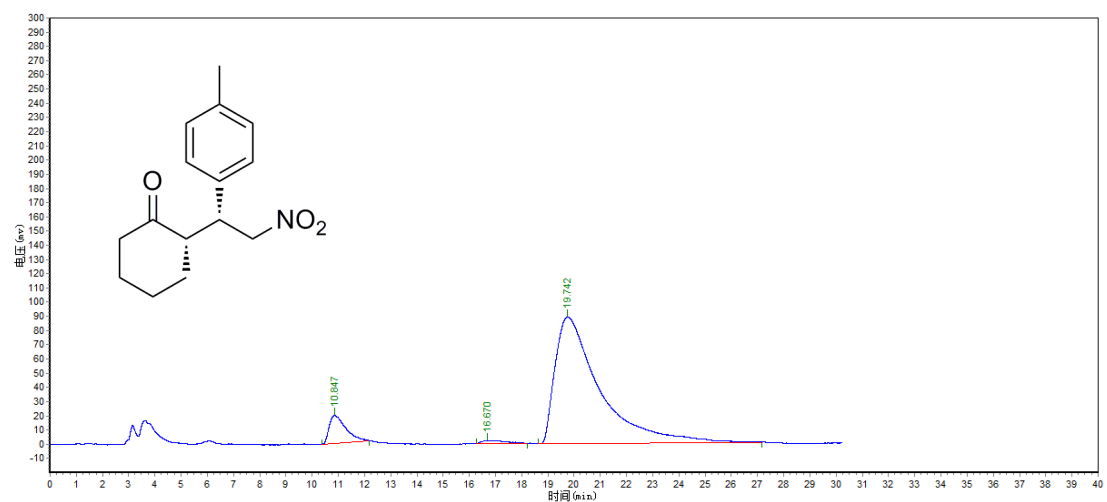

| Analysis Result |         |             |               |          |
|-----------------|---------|-------------|---------------|----------|
| Peak#           | RT(min) | Height (μV) | Area (μV*Sec) | Area%    |
| 1               | 10.847  | 19730.707   | 863682.000    | 7.5368   |
| 2               | 16.670  | 1971.928    | 123015.492    | 1.0735   |
| 3               | 19.742  | 89059.398   | 10472875.000  | 91.3898  |
| Total           |         | 110762.034  | 11459572.492  | 100.0000 |

Table 4 Entry 3

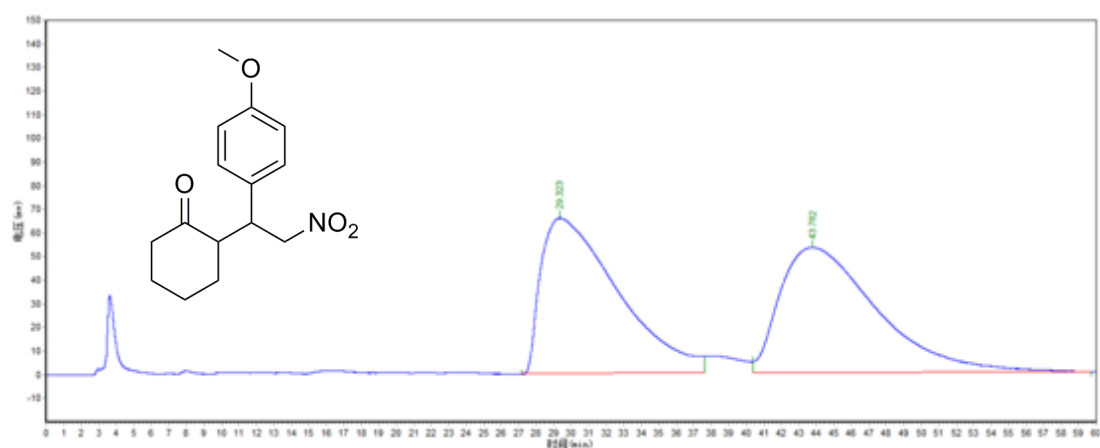

| Analysis Result |         |             |               |          |
|-----------------|---------|-------------|---------------|----------|
| Peak#           | RT(min) | Height (μV) | Area (μV*Sec) | Area%    |
| 1               | 29.323  | 65586.398   | 20023696.000  | 49.7180  |
| 2               | 43.782  | 52790.691   | 20250874.000  | 50.2820  |
| Total           |         | 118377.090  | 40274570.000  | 100.0000 |

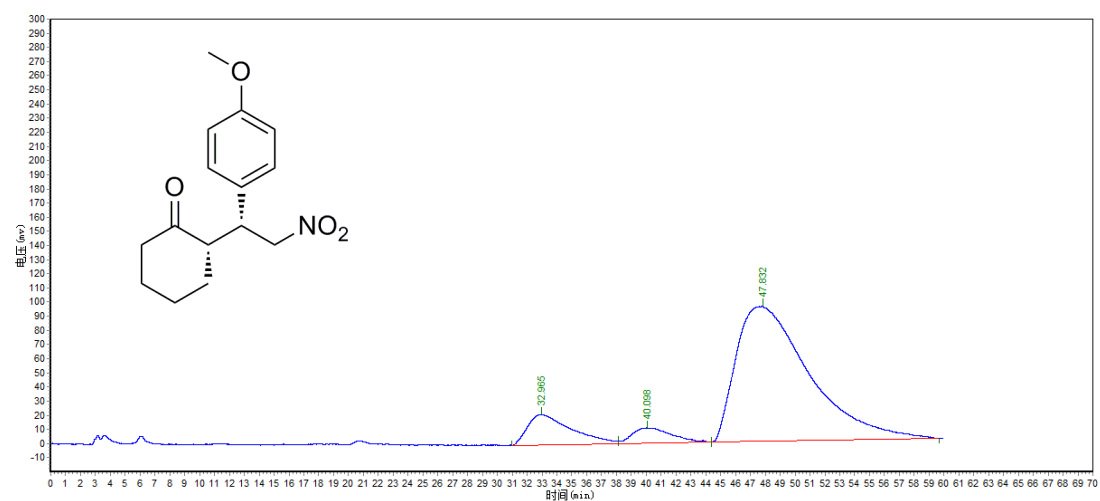

| Analysis Result |         |             |               |          |
|-----------------|---------|-------------|---------------|----------|
| Peak#           | RT(min) | Height (μV) | Area (μV*Sec) | Area%    |
| 1               | 32.965  | 21500.307   | 4407238.500   | 11.3307  |
| 2               | 40.098  | 10788.599   | 1996650.750   | 5.1333   |
| 3               | 47.832  | 95503.383   | 32492468.000  | 83.5360  |
| Total           |         | 127792.288  | 38896357.250  | 100.0000 |

Table 4 Entry 4

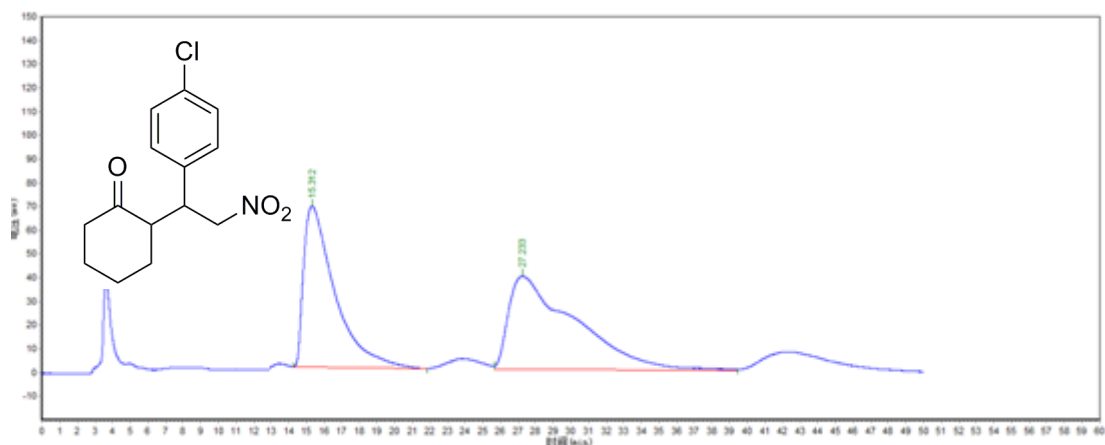

| Analysis Result |         |             |              |          |
|-----------------|---------|-------------|--------------|----------|
| Peak#           | RT(min) | Height (μV) | Area(μV*Sec) | Area%    |
| 1               | 15.312  | 67863.359   | 8339949.500  | 44.7806  |
| 2               | 27.233  | 39212.293   | 10284056.000 | 55.2194  |
| Total           |         | 107075.652  | 18624005.500 | 100.0000 |

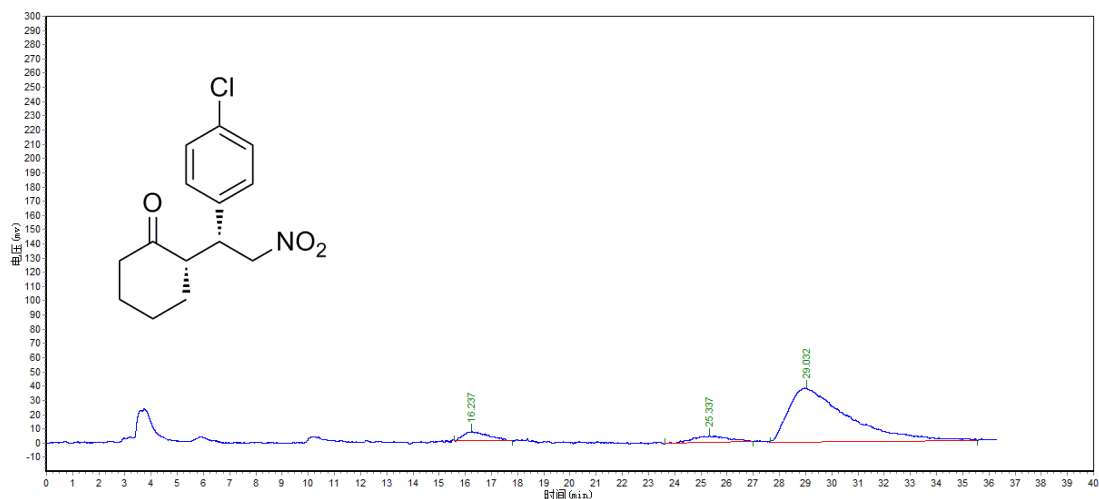

| Analysis Result |         |             |              |          |
|-----------------|---------|-------------|--------------|----------|
| Peak#           | RT(min) | Height (μV) | Area(μV*Sec) | Area%    |
| 1               | 16.237  | 5890.376    | 367247.406   | 5.4995   |
| 2               | 25.337  | 4461.787    | 441692.156   | 6.6143   |
| 3               | 29.032  | 37642.684   | 5868873.000  | 87.8862  |
| Total           |         | 47994.847   | 6677812.563  | 100.0000 |

Table 4 Entry 5

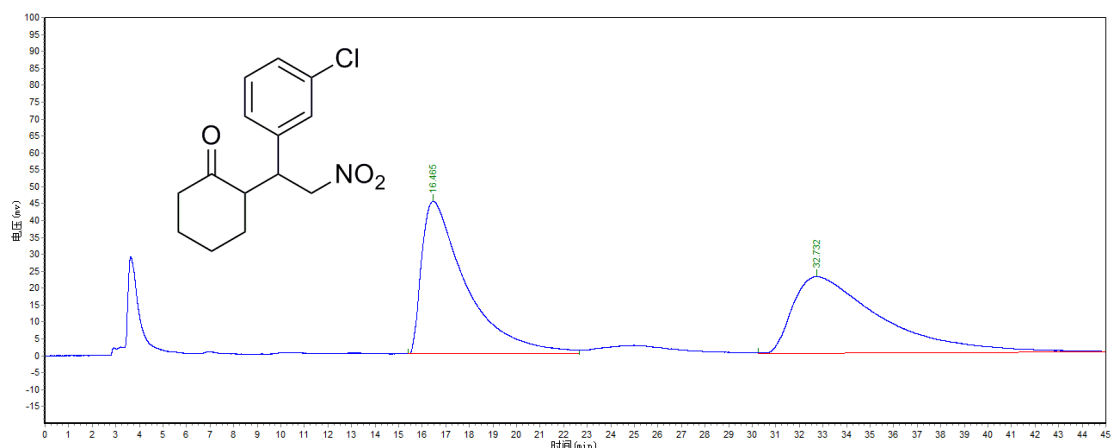

| Analysis Result |         |            |              |          |
|-----------------|---------|------------|--------------|----------|
| Peak#           | RT(min) | Height(μV) | Area(μV*Sec) | Area%    |
| 1               | 16.465  | 45082.438  | 5922708.000  | 50.5291  |
| 2               | 32.732  | 22478.158  | 5798669.500  | 49.4709  |
| Total           |         | 67560.596  | 11721377.500 | 100.0000 |

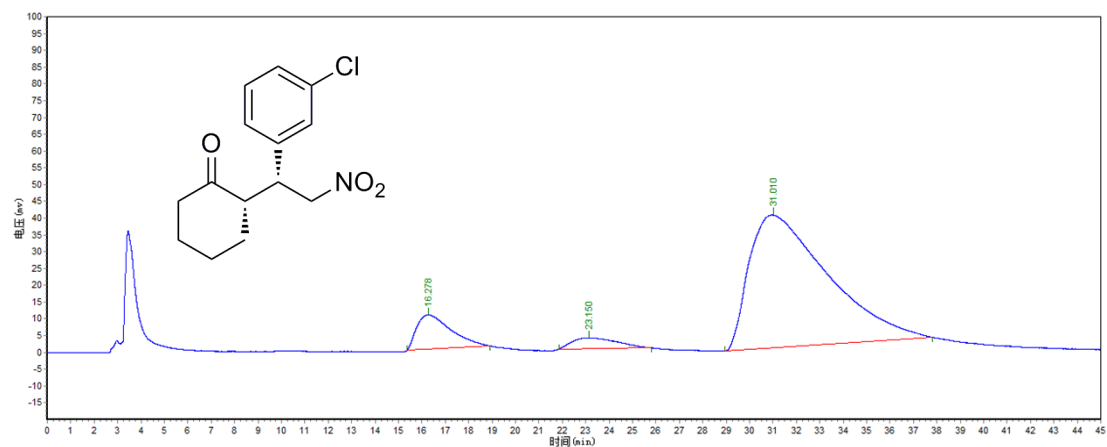

| Analysis Result |         |            |              |          |
|-----------------|---------|------------|--------------|----------|
| Peak#           | RT(min) | Height(μV) | Area(μV*Sec) | Area%    |
| 1               | 16.278  | 10285.205  | 1043212.188  | 9.7476   |
| 2               | 23.150  | 3238.591   | 422838.594   | 3.9509   |
| 3               | 31.010  | 39538.008  | 9236197.000  | 86.3015  |
| Total           |         | 53061.804  | 10702247.781 | 100.0000 |

Table 4 Entry 6

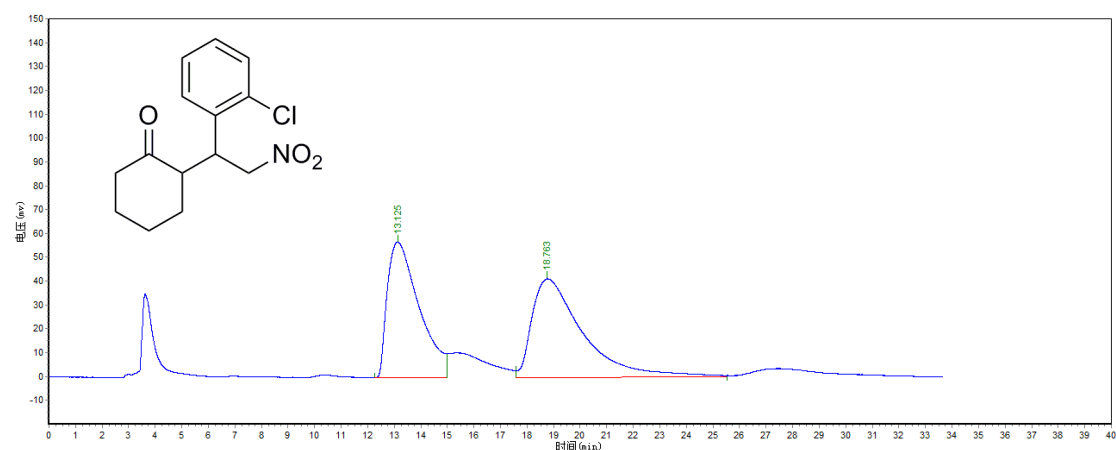

| Analysis Result |         |            |              |          |
|-----------------|---------|------------|--------------|----------|
| Peak#           | RT(min) | Height(μV) | Area(μV*Sec) | Area%    |
| 1               | 13.125  | 56786.285  | 4738040.000  | 46.2078  |
| 2               | 18.763  | 41309.098  | 5515724.000  | 53.7922  |
| Total           |         | 98095.383  | 10253764.000 | 100.0000 |

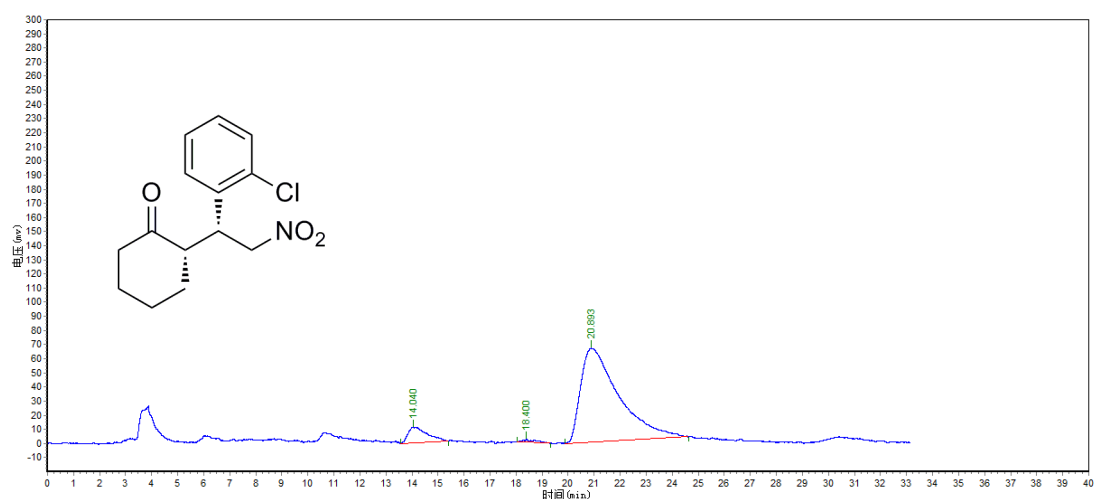

| Analysis Result |         |            |              |          |
|-----------------|---------|------------|--------------|----------|
| Peak#           | RT(min) | Height(μV) | Area(μV*Sec) | Area%    |
| 1               | 14.040  | 11324.587  | 574376.563   | 7.7897   |
| 2               | 18.400  | 2097.152   | 65977.453    | 0.8948   |
| 3               | 20.893  | 66391.016  | 6733215.500  | 91.3156  |
| Total           |         | 79812.754  | 7373569.516  | 100.0000 |

Table 4 Entry 7

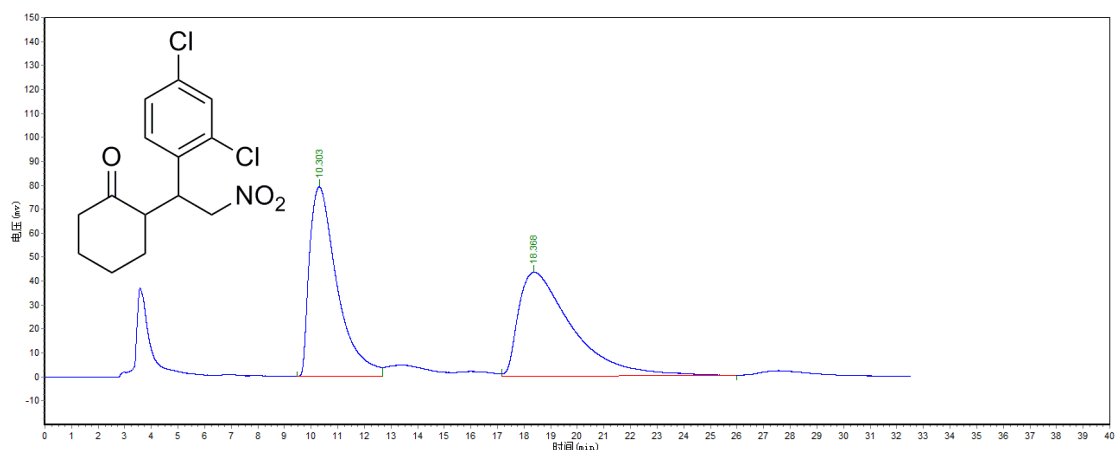

| Analysis Result |         |            |              |          |
|-----------------|---------|------------|--------------|----------|
| Peak#           | RT(min) | Height(μV) | Area(μV*Sec) | Area%    |
| 1               | 10.303  | 79064.203  | 5703810.000  | 48.6955  |
| 2               | 18.368  | 43301.738  | 6009399.000  | 51.3045  |
| Total           |         | 122365.941 | 11713209.000 | 100.0000 |

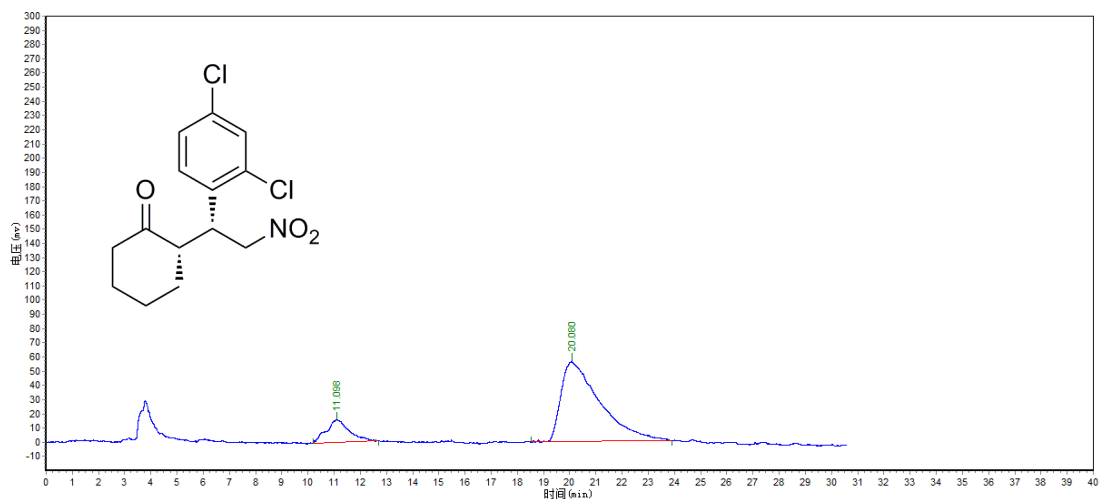

| Analysis Result |         |            |              |          |
|-----------------|---------|------------|--------------|----------|
| Peak#           | RT(min) | Height(μV) | Area(μV*Sec) | Area%    |
| 1               | 11.098  | 15992.151  | 942723.563   | 14.0263  |
| 2               | 20.080  | 56700.484  | 5778410.000  | 85.9737  |
| Total           |         | 72692.636  | 6721133.563  | 100.0000 |

Table 4 Entry 8

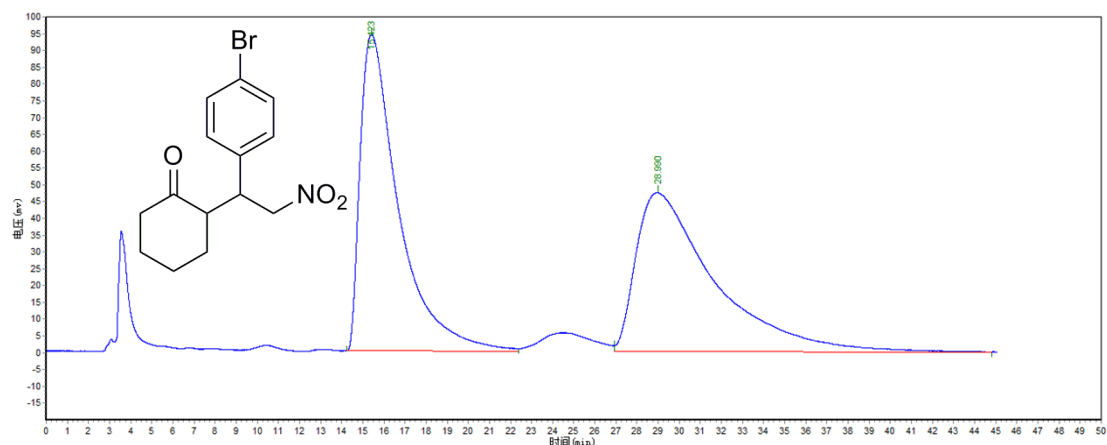

| Analysis Result |         |             |              |          |
|-----------------|---------|-------------|--------------|----------|
| Peak#           | RT(min) | Height (μV) | Area(μV*Sec) | Area%    |
| 1               | 15.423  | 94377.977   | 11961047.000 | 49.4972  |
| 2               | 28.990  | 47337.816   | 12204049.000 | 50.5028  |
| Total           |         | 141715.793  | 24165096.000 | 100.0000 |

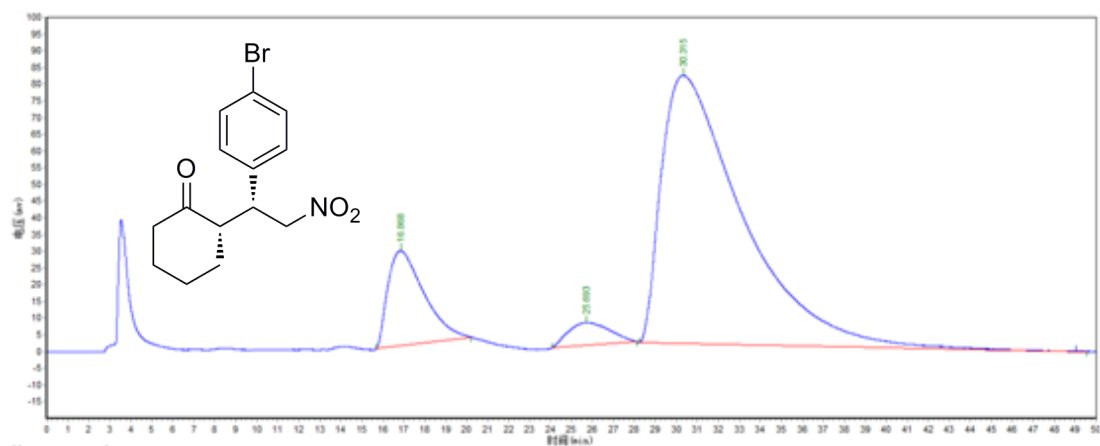

| Analysis Result |         |             |              |          |
|-----------------|---------|-------------|--------------|----------|
| Peak#           | RT(min) | Height (μV) | Area(μV*Sec) | Area%    |
| 1               | 16.868  | 28380.660   | 3373223.000  | 13.0806  |
| 2               | 25.693  | 6694.212    | 920293.563   | 3.5687   |
| 3               | 30.315  | 80084.531   | 21494562.000 | 83.3508  |
| Total           |         | 115159.403  | 25788078.563 | 100.0000 |

Table 4 Entry 9

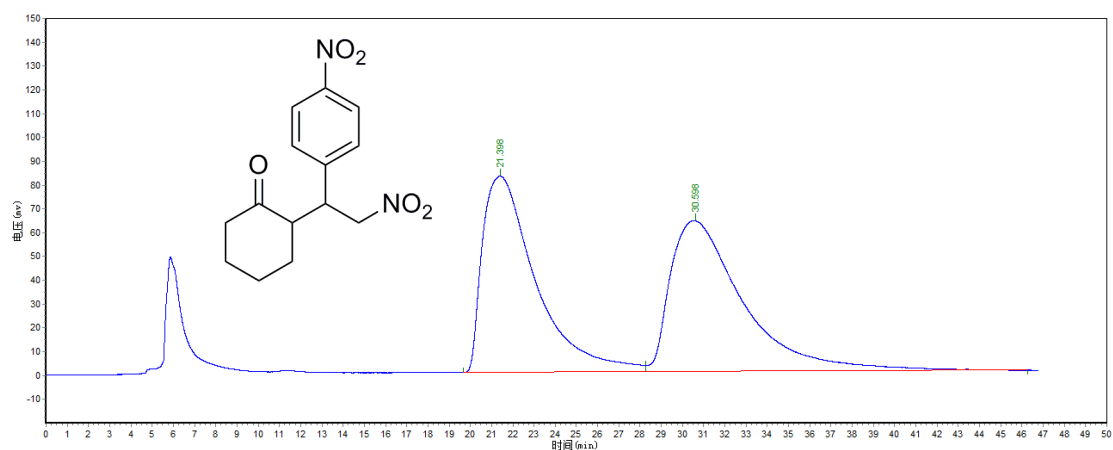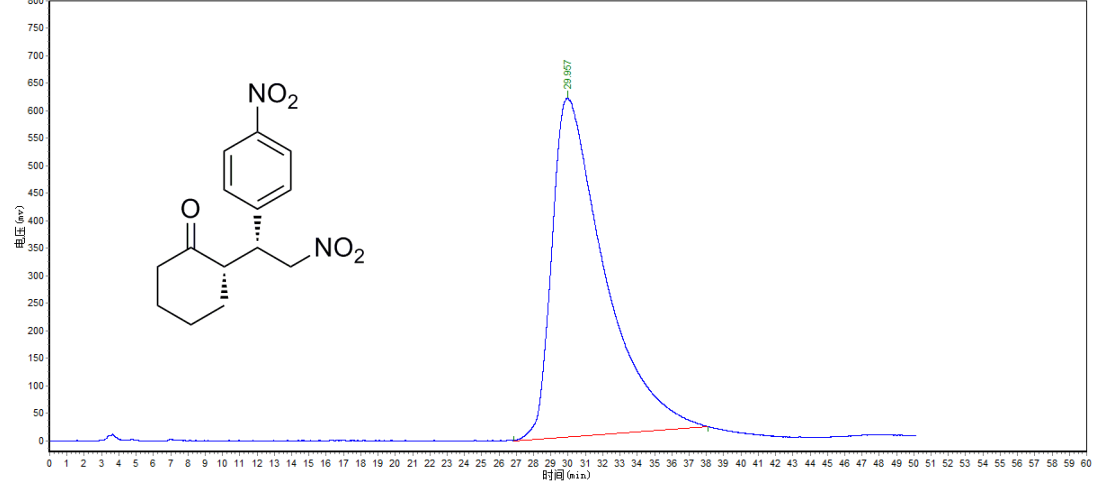

Table 4 Entry 10

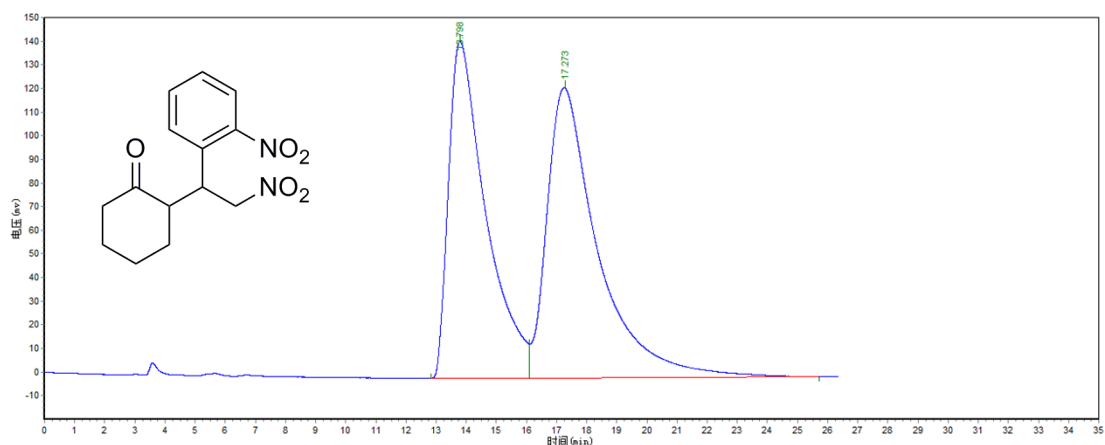

| Analysis Result |         |            |              |          |
|-----------------|---------|------------|--------------|----------|
| Peak#           | RT(min) | Height(μV) | Area(μV*Sec) | Area%    |
| 1               | 13.798  | 142498.188 | 12231177.000 | 45.9604  |
| 2               | 17.273  | 122675.844 | 14381274.000 | 54.0396  |
| Total           |         | 265174.031 | 26612451.000 | 100.0000 |

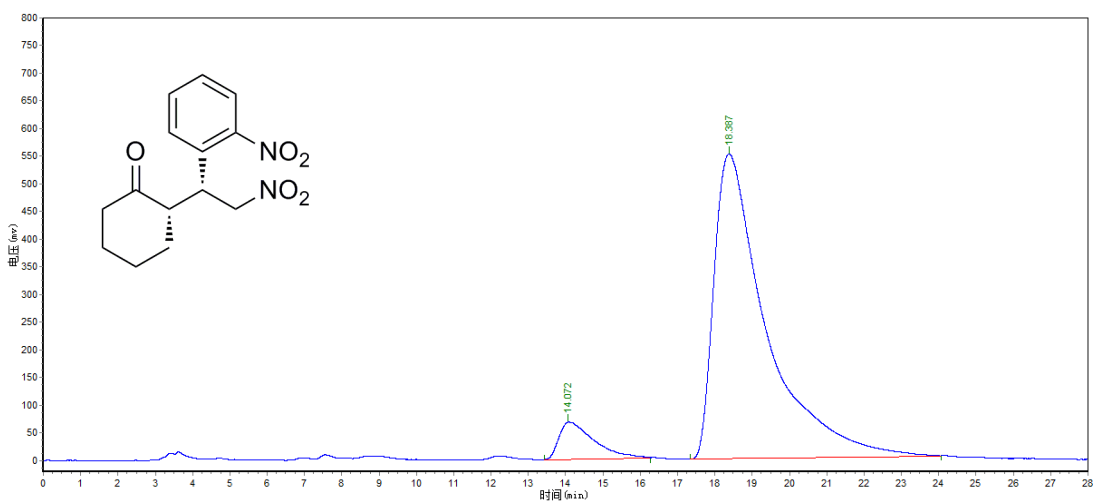

| Analysis Result |         |            |              |          |
|-----------------|---------|------------|--------------|----------|
| Peak#           | RT(min) | Height(μV) | Area(μV*Sec) | Area%    |
| 1               | 14.072  | 67007.227  | 4308485.500  | 7.4579   |
| 2               | 18.387  | 551076.938 | 53462024.000 | 92.5421  |
| Total           |         | 618084.164 | 57770509.500 | 100.0000 |

Table 4 Entry 11

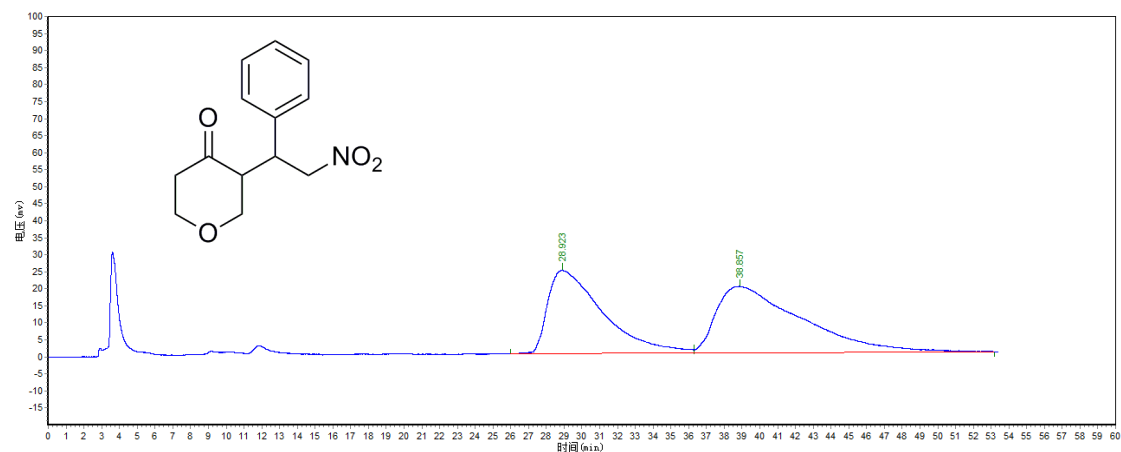

| Analysis Result |         |             |              |          |
|-----------------|---------|-------------|--------------|----------|
| Peak#           | RT(min) | Height (μV) | Area(μV*Sec) | Area%    |
| 1               | 28.923  | 24530.600   | 5304054.000  | 44.7906  |
| 2               | 38.857  | 19564.703   | 6537829.000  | 55.2094  |
| Total           |         | 44095.303   | 11841883.000 | 100.0000 |

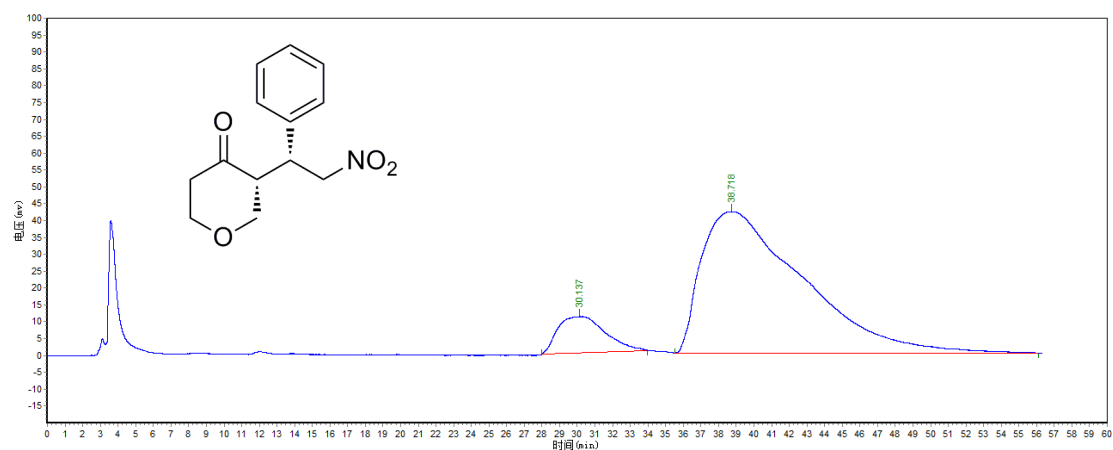

| Analysis Result |         |             |              |          |
|-----------------|---------|-------------|--------------|----------|
| Peak#           | RT(min) | Height (μV) | Area(μV*Sec) | Area%    |
| 1               | 30.137  | 10763.868   | 1999865.000  | 10.6702  |
| 2               | 38.718  | 41913.688   | 16742610.000 | 89.3298  |
| Total           |         | 52677.556   | 18742475.000 | 100.0000 |

Table 4 Entry 12

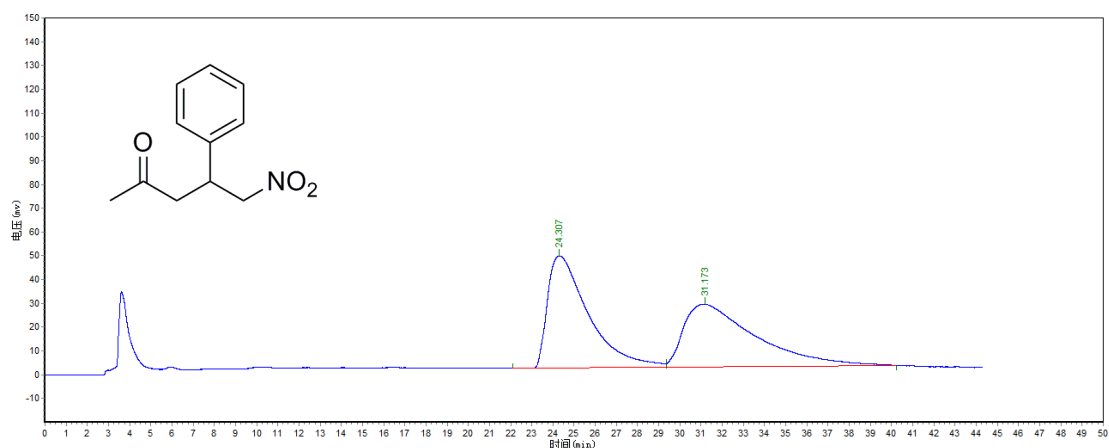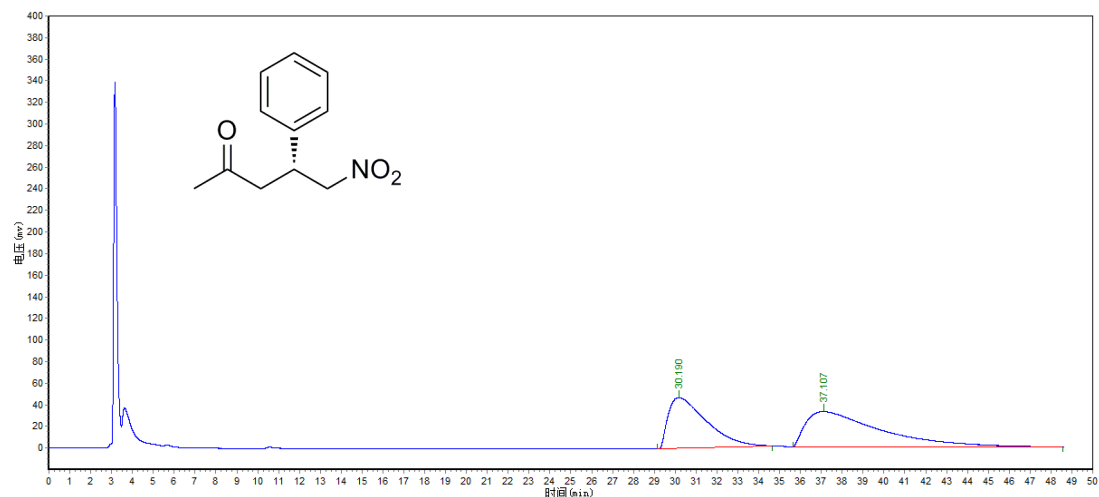

Table 4 Entry 13

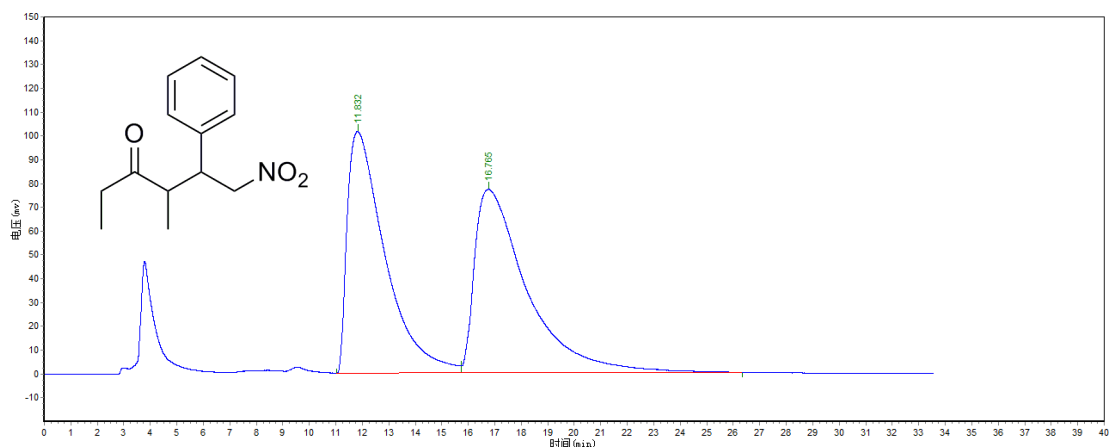

| Analysis Result |         |             |              |          |
|-----------------|---------|-------------|--------------|----------|
| Peak#           | RT(min) | Height (μV) | Area(μV*Sec) | Area%    |
| 1               | 11.832  | 101463.625  | 10048938.000 | 48.6692  |
| 2               | 16.765  | 77076.828   | 10598503.000 | 51.3308  |
| Total           |         | 178540.453  | 20647441.000 | 100.0000 |

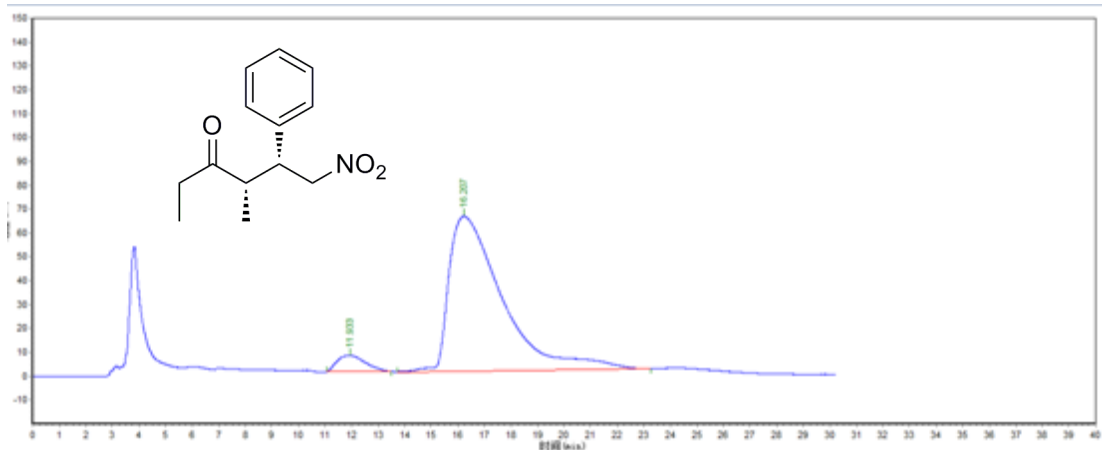

| Analysis Result |         |             |              |          |
|-----------------|---------|-------------|--------------|----------|
| Peak#           | RT(min) | Height (μV) | Area(μV*Sec) | Area%    |
| 1               | 11.933  | 6792.436    | 497742.656   | 5.2073   |
| 2               | 16.207  | 64870.738   | 9060862.000  | 94.7927  |
| Total           |         | 71663.174   | 9558604.656  | 100.0000 |

Table 4 Entry 14

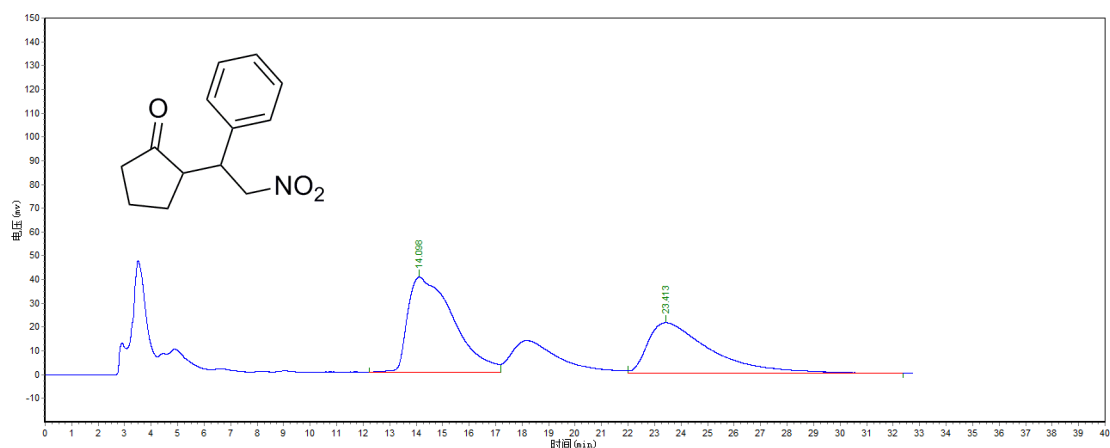

| Analysis Result |         |            |              |          |
|-----------------|---------|------------|--------------|----------|
| Peak#           | RT(min) | Height(μV) | Area(μV*Sec) | Area%    |
| 1               | 14.098  | 40058.582  | 4808921.500  | 58.0789  |
| 2               | 23.413  | 21163.809  | 3471055.750  | 41.9211  |
| Total           |         | 61222.391  | 8279977.250  | 100.0000 |

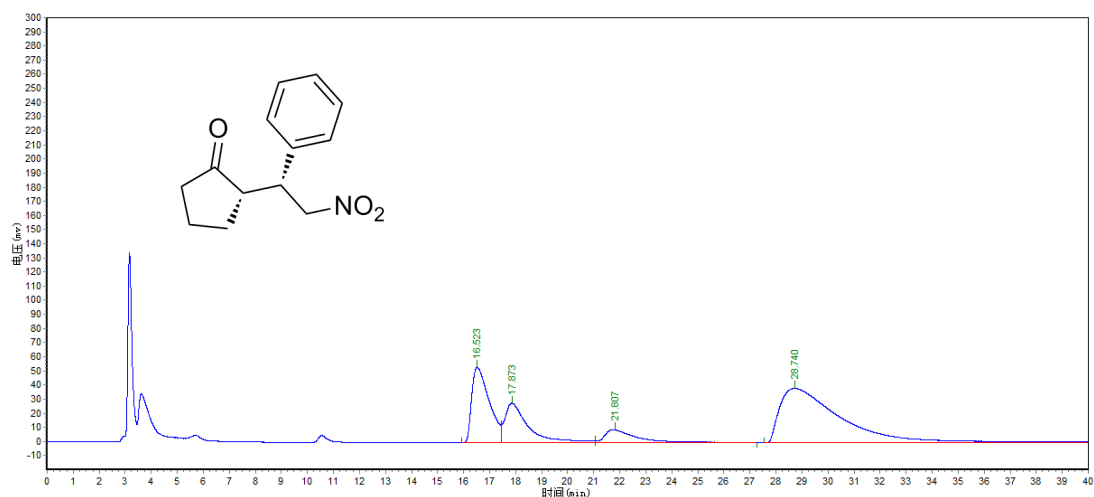

| Analysis Result |         |            |              |          |
|-----------------|---------|------------|--------------|----------|
| Peak#           | RT(min) | Height(μV) | Area(μV*Sec) | Area%    |
| 1               | 16.523  | 53265.926  | 2502649.500  | 20.9178  |
| 2               | 17.873  | 27991.076  | 1764279.625  | 14.7463  |
| 3               | 21.807  | 9135.583   | 788902.250   | 6.5939   |
| 4               | 28.740  | 38378.391  | 6908371.000  | 57.7420  |
| Total           |         | 128770.976 | 11964202.375 | 100.0000 |

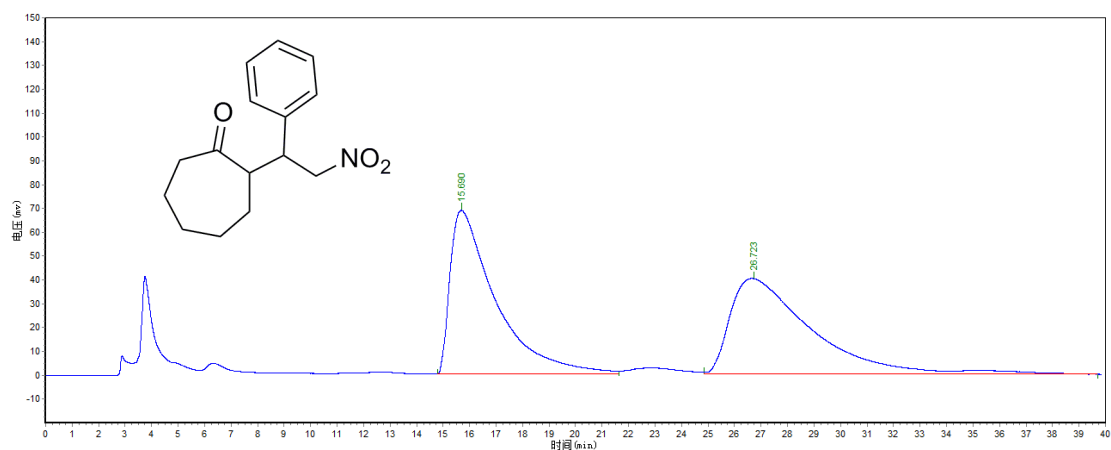

| Analysis Result |         |             |              |          |
|-----------------|---------|-------------|--------------|----------|
| Peak#           | RT(min) | Height (μV) | Area(μV*Sec) | Area%    |
| 1               | 15.690  | 68585.500   | 8193990.000  | 48.9498  |
| 2               | 26.723  | 40098.426   | 8545589.000  | 51.0502  |
| Total           |         | 108683.926  | 16739579.000 | 100.0000 |

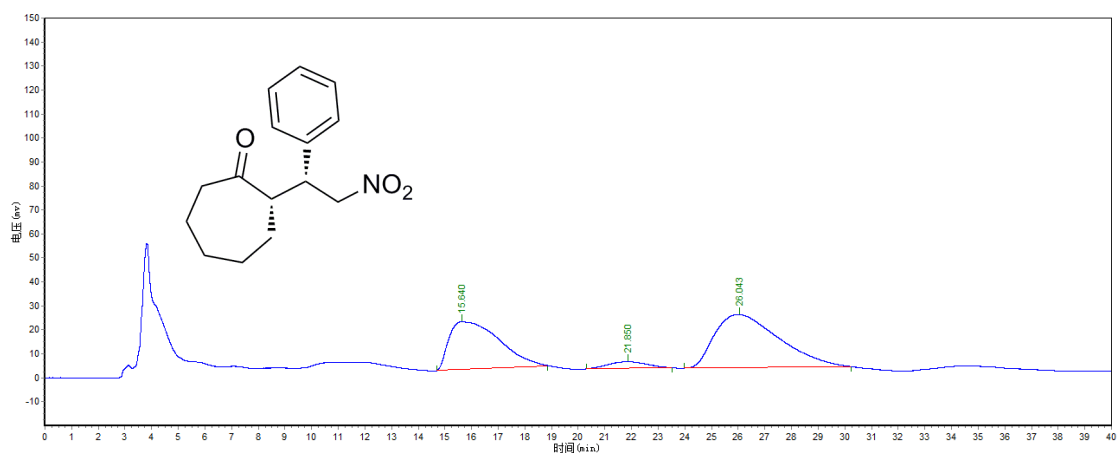

| Analysis Result |         |             |              |          |
|-----------------|---------|-------------|--------------|----------|
| Peak#           | RT(min) | Height (μV) | Area(μV*Sec) | Area%    |
| 1               | 15.640  | 19913.268   | 2582301.750  | 39.2885  |
| 2               | 21.850  | 2780.016    | 277117.844   | 4.2162   |
| 3               | 26.043  | 22149.949   | 3713245.000  | 56.4953  |
| Total           |         | 44843.233   | 6572664.594  | 100.0000 |

Table 4 Entry 16

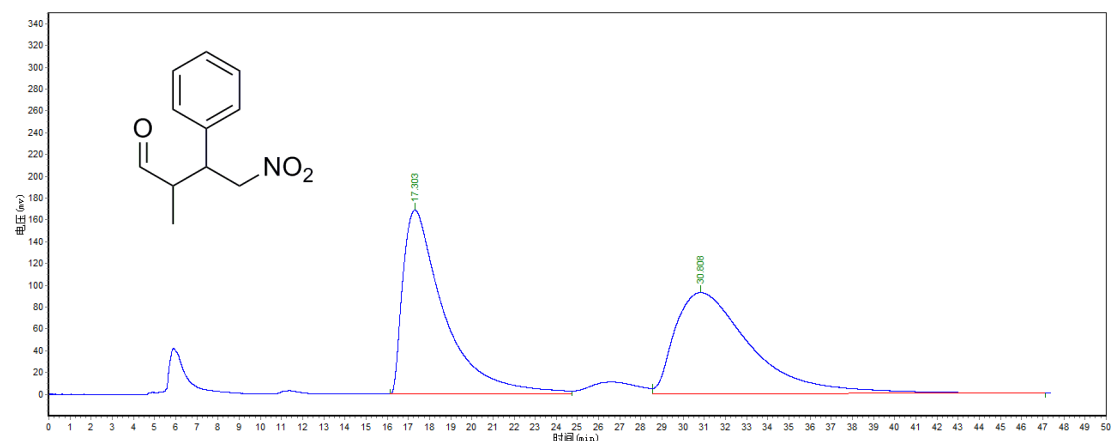

| Analysis Result |         |            |              |          |
|-----------------|---------|------------|--------------|----------|
| Peak#           | RT(min) | Height(μV) | Area(μV*Sec) | Area%    |
| 1               | 17.303  | 168673.984 | 22888412.000 | 49.6842  |
| 2               | 30.808  | 92737.172  | 23179366.000 | 50.3158  |
| Total           |         | 261411.156 | 46067778.000 | 100.0000 |

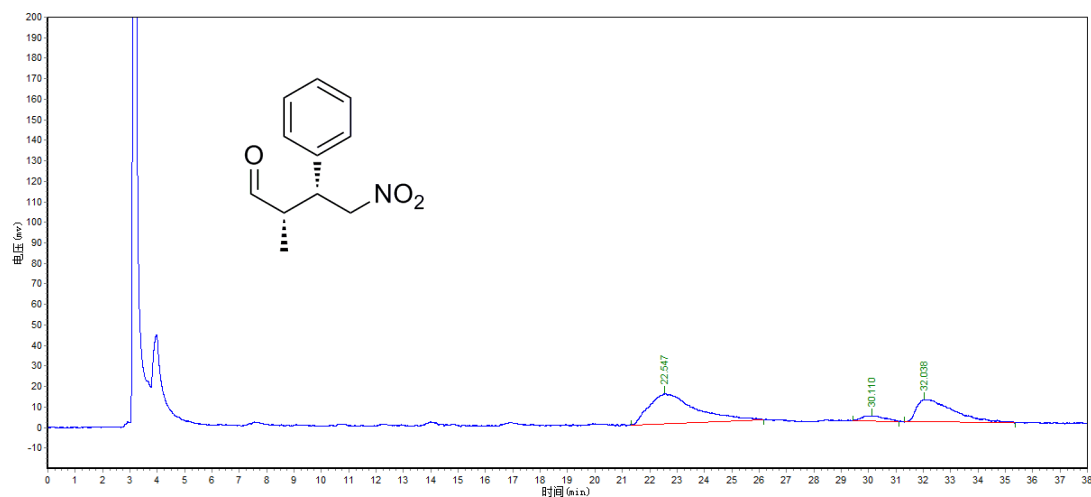

| Analysis Result |         |            |              |          |
|-----------------|---------|------------|--------------|----------|
| Peak#           | RT(min) | Height(μV) | Area(μV*Sec) | Area%    |
| 1               | 22.547  | 14475.535  | 1706031.375  | 59.5330  |
| 2               | 30.110  | 2395.877   | 140047.266   | 4.8870   |
| 3               | 32.038  | 10872.851  | 1019613.938  | 35.5800  |
| Total           |         | 27744.262  | 2865692.578  | 100.0000 |

Table 4 Entry 17

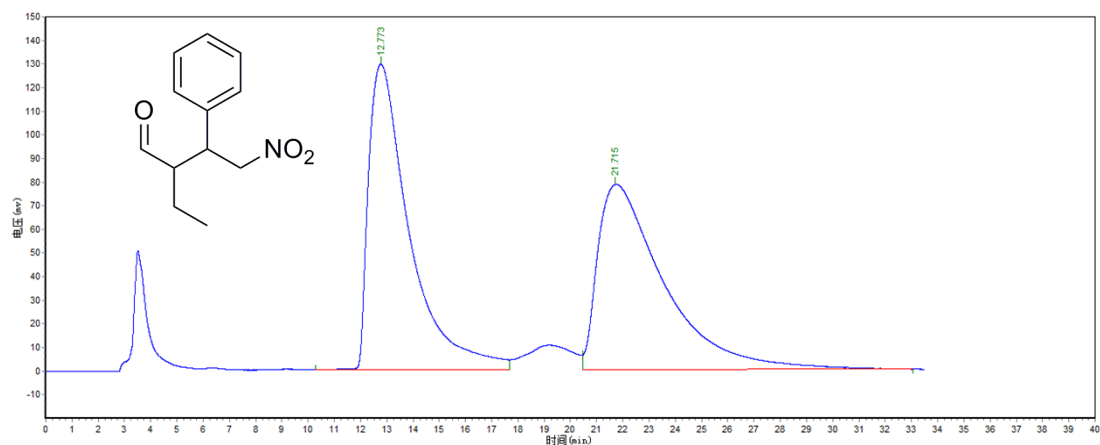

| Analysis Result |         |            |              |          |
|-----------------|---------|------------|--------------|----------|
| Peak#           | RT(min) | Height(μV) | Area(μV*Sec) | Area%    |
| 1               | 12.773  | 129417.828 | 13990152.000 | 50.3537  |
| 2               | 21.715  | 78343.961  | 13793603.000 | 49.6463  |
| Total           |         | 207761.789 | 27783755.000 | 100.0000 |

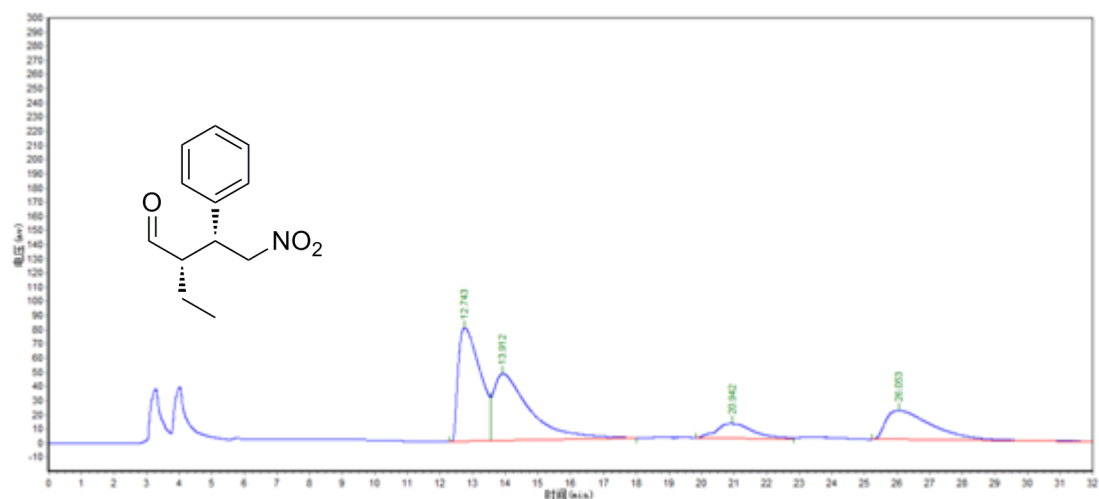

| Analysis Result |         |            |              |          |
|-----------------|---------|------------|--------------|----------|
| Peak#           | RT(min) | Height(μV) | Area(μV*Sec) | Area%    |
| 1               | 12.743  | 79898.023  | 3736924.000  | 37.0849  |
| 2               | 13.912  | 47119.488  | 3646401.500  | 36.1865  |
| 3               | 20.942  | 10112.525  | 788804.625   | 7.8280   |
| 4               | 26.053  | 20122.066  | 1904552.625  | 18.9006  |
| Total           |         | 157252.104 | 10076682.750 | 100.0000 |

HPLC analysis results of Fig. 3:

Column model: Agilent Prep-C18 Scalar PN440910-902;

Mobile phase: CH<sub>3</sub>OH:H<sub>2</sub>O=3:2; Flow rate: 0.7 mL/min; Injected volume: 10 µL

Concentration: 0.1 mol/L

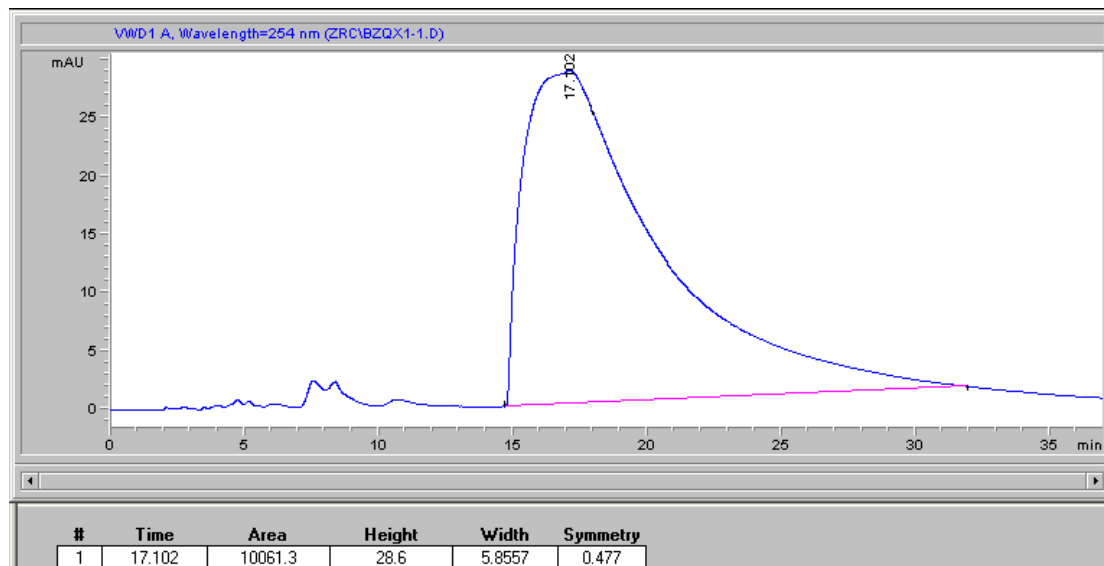

Concentration: 0.2 mol/L

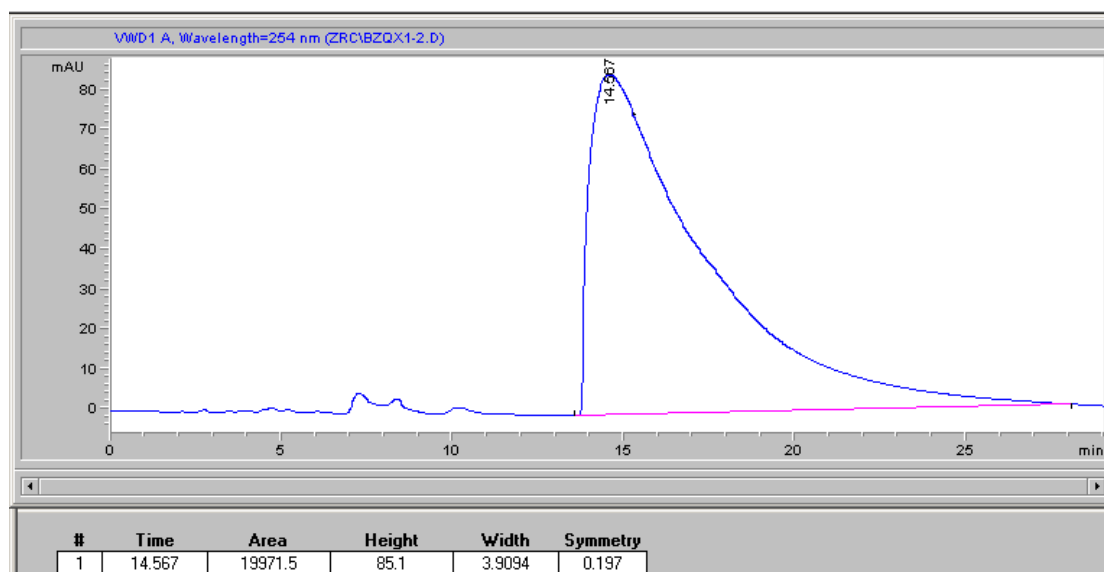

Concentration: 0.3 mol/L

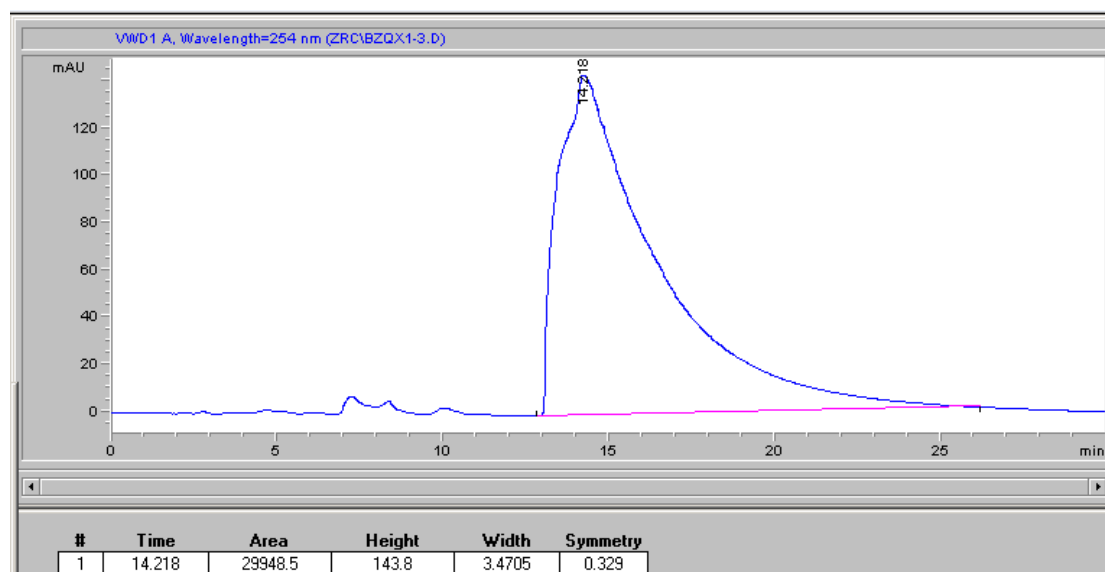

Concentration: 0.4 mol/L

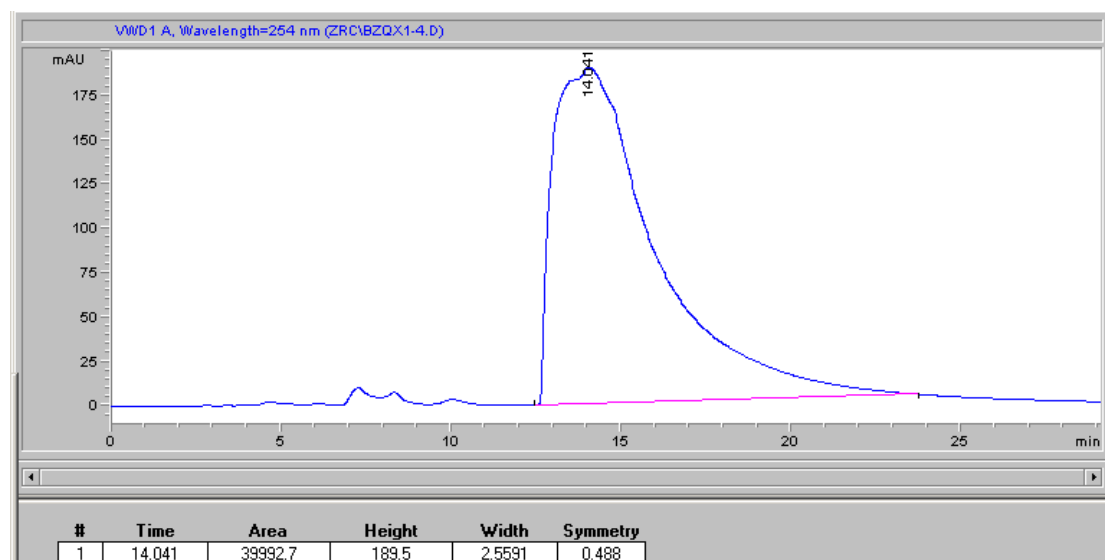

Sample:

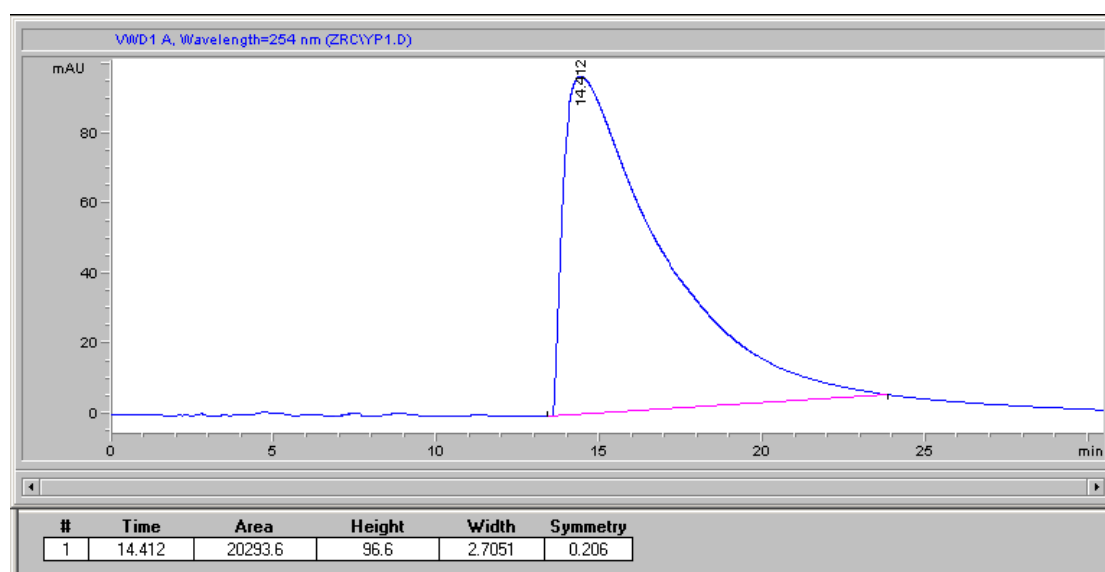

HPLC analysis results of Fig. 4:

Column model: Agilent Prep-C18 Scalar PN440910-902;

Mobile phase: CH<sub>3</sub>OH:H<sub>2</sub>O=3:2; Flow rate: 0.7 mL/min; Injected volume: 10 µL

Concentration: 0.025 mol/L

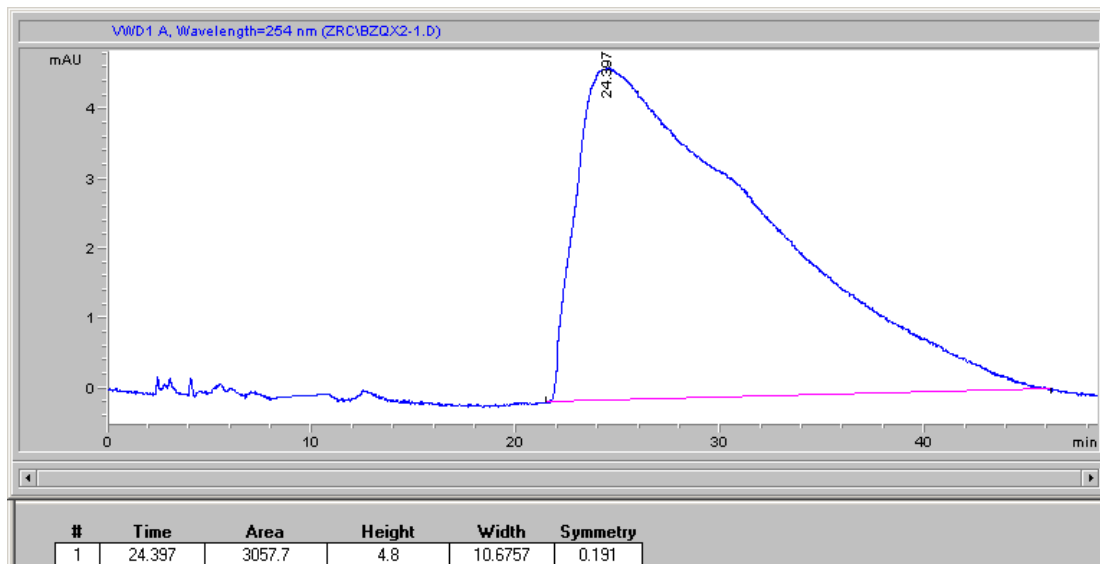

Concentration: 0.05 mol/L

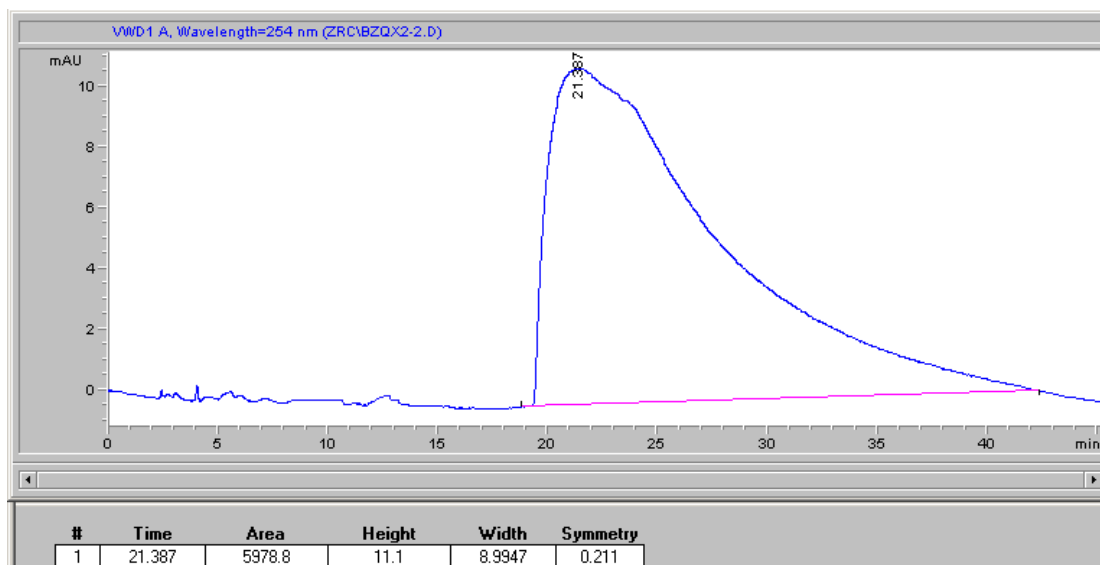

Concentration: 0.075 mol/L

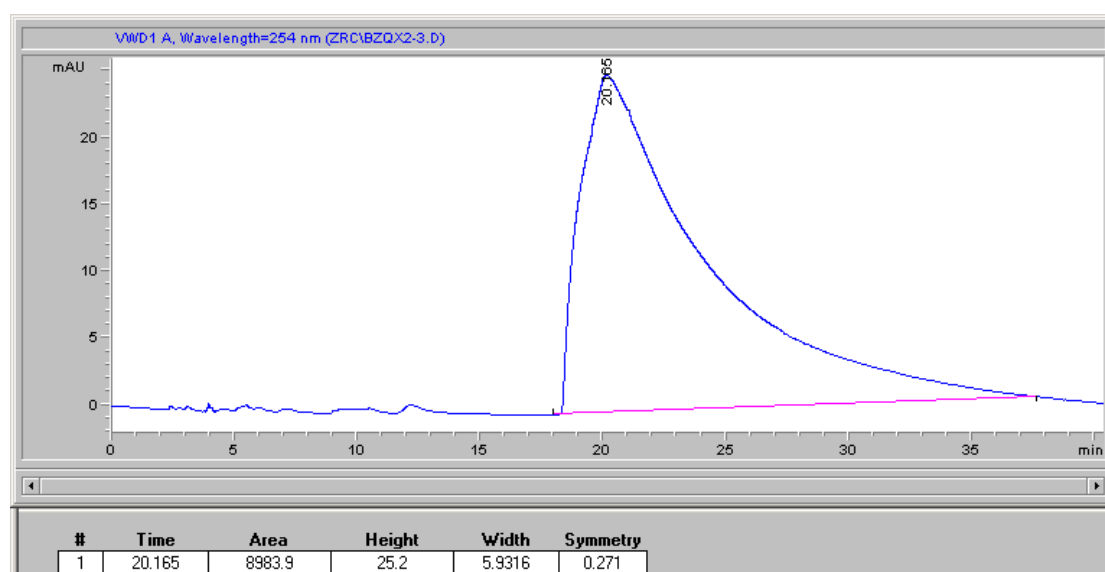

Concentration: 0.10 mol/L

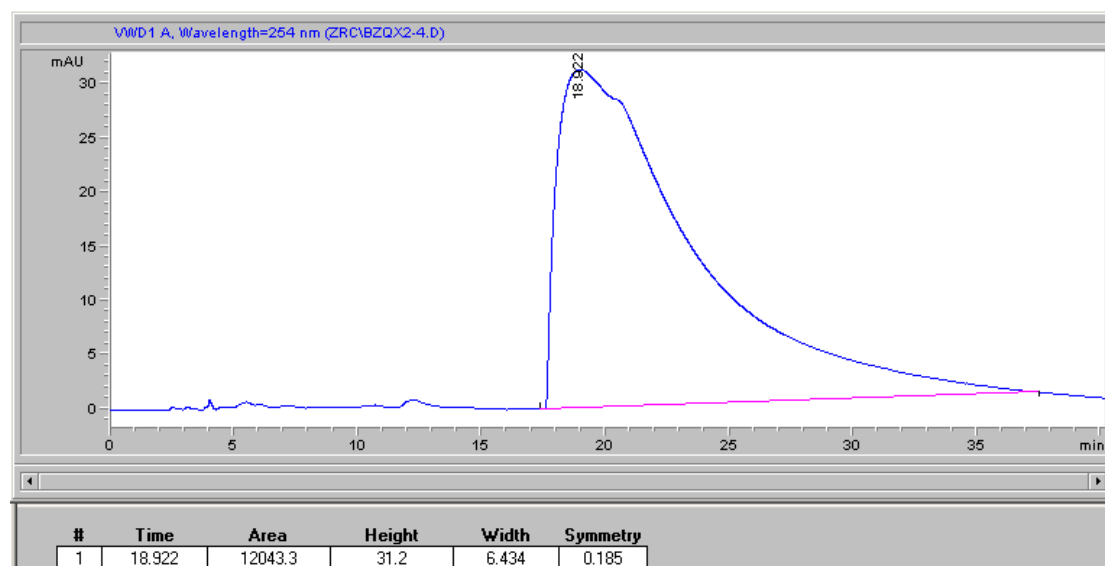

Sample:

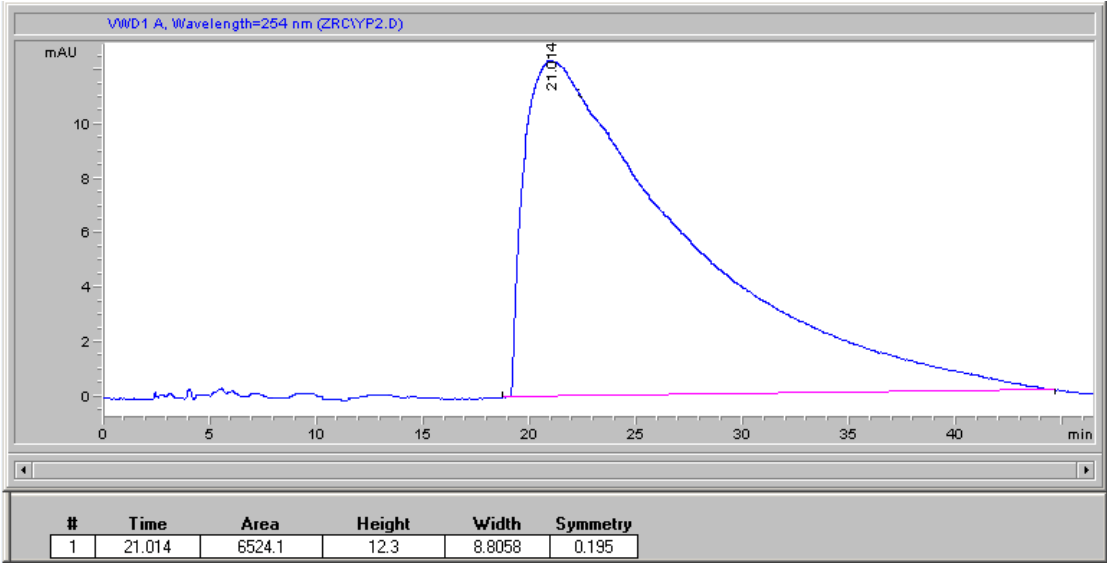

Supplement: c4ra10684a1.pdf [file c4ra10684a1.pdf]
